1 [mBio \(Research Article\)](#)

2

3 **Chained structure of dimeric F<sub>1</sub>-like ATPase in *Mycoplasma mobile***  
4 **gliding machinery**

5 Takuma Toyonaga<sup>a</sup>, Takayuki Kato<sup>b</sup>, Akihiro Kawamoto<sup>b</sup>, Noriyuki Kodera<sup>c</sup>, Tasuku  
6 Hamaguchi<sup>a,d</sup>, Yuhei O Tahara<sup>a,d</sup>, Toshio Ando<sup>c</sup>, Keiichi Namba<sup>e,f,g</sup>, Makoto  
7 Miyata<sup>a,d,#</sup>

8

9 <sup>a</sup>Graduate School of Science, Osaka City University, 3-3-138 Sugimoto,  
10 Sumiyoshi-ku, Osaka 558-8585, Japan.

11 <sup>b</sup>Institute for Protein Research, Osaka University, 3-2 Yamadaoka, Suita, Osaka,  
12 565-0871, Japan.

13 <sup>c</sup>Nano Life Science Institute (WPI-NanoLSI), Kanazawa University, Kakuma-chou,  
14 Kanazawa, Ishikawa 920-1192, Japan.

15 <sup>d</sup>The OCU Advanced Research Institute for Natural Science and Technology  
16 (OCARINA), Osaka City University, 3-3-138 Sugimoto, Sumiyoshi-ku, Osaka  
17 558-8585, Japan.

18 <sup>e</sup>Graduate School of Frontier Biosciences, Osaka University, 1-3 Yamadaoka, Suita,  
19 Osaka, 565-0871, Japan.

20 <sup>f</sup>RIKEN Center for Biosystems Dynamics Research and SPring-8 Center, 1-3  
21 Yamadaoka, Suita, Osaka, 565-0871, Japan.

22 <sup>9</sup>JEOL YOKOGUSHI Research Alliance Laboratories, Osaka University, 1-3

23 Yamadaoka, Suita, Osaka, 565-0871, Japan.

24

25 #Address correspondence to Makoto Miyata, [miyata@osaka-cu.ac.jp](mailto:miyata@osaka-cu.ac.jp)

26 Present address: Tasuku Hamagichi: Biostructural Mechanism Laboratory, RIKEN

27 SPring-8 Center, 1-1-1 Kouto, Sayo, Hyogo, 679-5148, Japan.

28

29 Running title: Gliding machinery of *Mycoplasma mobile*

30 Keywords: F<sub>1</sub>-ATPase, rotary motor, parasitic bacteria, electron microscopy, atomic

31 force microscopy, bacterial motility

32 **ABSTRACT**

33 *Mycoplasma mobile*, a fish pathogen, exhibits gliding motility using ATP hydrolysis  
34 on solid surfaces, including animal cells. The gliding machinery can be divided into  
35 surface and internal structures. Interestingly, the internal structure of the probable  
36 gliding motor has 28 protein chains, each of which has 17 particles composed of  
37 homologs of the catalytic  $\alpha$ - and  $\beta$ -subunits of  $F_1$ -ATPase. In this study, we isolated  
38 chain particles and determined their structures using negative-staining electron  
39 microscopy and high-speed atomic force microscopy. The isolated chain particles  
40 were composed of five proteins, MMOBs 1660 ( $\alpha$ -subunit homolog), 1670  
41 ( $\beta$ -subunit homolog), 1630, 1620, and 4530, and showed ATP hydrolyzing activity.  
42 The 2D structure, with dimensions of 35 and 26 nm, showed a hexameric ring dimer  
43 about 12 nm in diameter, resembling  $F_1$ -ATPase catalytic  $(\alpha\beta)_3$ . We isolated the  
44  $F_1$ -like ATPase unit, which is composed of MMOBs 1660, 1670, and 1630.  
45 Furthermore, we isolated the complex in chain form and analyzed the 3D structure,  
46 showing that dimers of mushroom-like structures resembling  $F_1$ -ATPase were  
47 connected and aligned along the dimer axis at 31 nm intervals. An atomic model of  
48  $F_1$ -ATPase catalytic  $(\alpha\beta)_3$  from *Bacillus* PS3 was successfully fitted to each  
49 hexameric ring of the mushroom-like structure. These results suggest that the motor  
50 for *M. mobile* gliding shares an evolutionary origin with  $F_1$ -ATPase. Based on the  
51 obtained structure, we propose possible force transmission processes in the gliding  
52 mechanism.

53

54 **IMPORTANCE**

55 F<sub>1</sub>F<sub>o</sub>-ATPase, a rotary ATPase, is widespread in the membranes of mitochondria,  
56 chloroplasts, and bacteria, and converts ATP energy with a proton motive force  
57 across the membrane by its physical rotation. Homologous protein complexes play  
58 roles in ion and protein transport. *Mycoplasma mobile*, a pathogenic bacterium, was  
59 recently suggested to have a special motility system evolutionarily derived from  
60 F<sub>1</sub>-ATPase. The present study isolated the protein complex from *Mycoplasma* cells  
61 and supported this conclusion by clarifying the detailed structures containing  
62 common and novel features as F<sub>1</sub>-ATPase relatives.

## 63 INTRODUCTION

64 Mycoplasmas are parasitic bacteria characterized by small cell size, a short  
65 genome and lack of a peptidoglycan layer (1-3). Many *Mycoplasma* species exhibit  
66 a unique gliding motility, which is necessary for their infection (4-6). *Mycoplasma*  
67 *mobile* glides on solid surfaces at 2.0 to 4.5  $\mu\text{m/s}$  in the direction of a protrusion on  
68 one side of the cell (Fig. 1A) (5). The gliding machinery is localized to the cell  
69 protrusion and can be divided into surface and internal structures (Fig. 1B, upper).  
70 The surface structure has approximately 450 repeats of a complex of three large  
71 proteins, Gli123, Gli521, and Gli349, inserted into the cell membrane (Fig. 1B,  
72 lower) (7-11). Fifty-nm-long leg structures corresponding to Gli349 molecules can  
73 be seen jutting out from cell protrusion by electron microscopy (EM) (12). The tip of  
74 Gli349 is characterized by a "foot" with an oval structure that can bind to sialylated  
75 oligosaccharides (SOs) (13-20). Gli521 and Gli123 serve as the "crank" that  
76 transfers force to Gli349 and the "mount" that localizes the other two surface  
77 proteins to the gliding machinery, respectively. A working model of the gliding  
78 mechanism has been proposed in which the cells are propelled by Gli349 molecules  
79 that repeatedly catch, pull, and release SOs on solid surfaces (5, 21-23).

80 The internal structure consists of a lumpy structure at the tip of the cell  
81 protrusion and 28 "chains" lining the inner membrane surface (Fig. 1B) (23-26).  
82 Each chain is characterized by 17 repeating particle structures, resulting in a total of  
83 476 particles in one cell. The internal structure consists of at least ten proteins (Fig.  
84 1C). Six of these proteins, MMOBs 1620, 1630, 1640, 1650, 1660 and 1670 were

85 coded tandemly in a locus. Interestingly, MMOBs 1660 and 1670, which have  
86 Walker A and B motifs that are involved in ATP binding and hydrolysis (27), show  
87 high amino acid sequence identity with the catalytic subunits  $\alpha$  and  $\beta$  of  $F_1$ -ATPase,  
88 respectively. MMOB1670 has an extra N-terminal region (amino acids 1–299),  
89 which is not present in the  $\beta$  subunit.

90  $F_1F_o$ -ATPases, found in most organisms, are rotary motors that perform  
91 biological energy conversion (28, 29). Their role is to both synthesize ATP using a  
92 proton motive force and, conversely, to hydrolyze ATP to drive protons to maintain  
93 the membrane potential. Their structure is composed of a soluble catalytic  
94  $F_1$ -domain for ATP catalysis and a membrane-embedded  $F_o$ -domain for the proton  
95 pathway. In the  $F_1$ -domain, the catalytic subunits  $\alpha$  and  $\beta$  alternate to form a  
96 hexameric ring  $(\alpha\beta)_3$  that rotates the central stalk penetrating the ring using ATP  
97 hydrolysis. Phylogenetic studies have shown that *Mycoplasma* have three  $F_1$ -like  
98 ATPase clusters, which are referred to as Type 1–3 ATPases (26, 30). Type 1, found  
99 in all mycoplasmas, is a typical operon encoding  $F_1F_o$ -ATPase and is likely to  
100 function as a proton pump to maintain membrane potential. Type 3 is found in  
101 mycoplasmas that have an MIB-MIP system to cleave host immunoglobulins (31).  
102 Type 2 is only found in four *Mycoplasma* species, including *M. mobile*. Interestingly,  
103 the Type 2 ATPase of *M. mobile*, which encodes MMOB1620–70, is involved in the  
104 internal structure of the gliding machinery.

105 Recently, the chains of the internal structure were shown to have structural  
106 changes linked to ATP hydrolysis, suggesting that they drive gliding motility (23, 32).

107 However, it is still unclear how the chain generates and transmits the force to the  
108 outside, because its detailed structure has not been clarified. In this study, we  
109 isolated the chains and their component particles and elucidated their structures.  
110 The structure had a common architecture with F<sub>1</sub>-ATPase, suggesting that the chain  
111 shares a common evolutionary origin with F<sub>1</sub>-ATPase. Based on our findings, we  
112 suggest two possible force transmission models for the gliding machinery.

113

## 114 **Results**

115 **Isolation and biochemical analyses of chain particles.** To examine the  
116 solubility of the chain particles, we lysed cultured *M. mobile* cells with 1% Triton  
117 X-100 and recovered the insoluble fraction by centrifugation (24). We then  
118 suspended the insoluble fraction with buffers containing various concentrations of  
119 NaCl and examined the solubility of the chain particles by centrifugation (Fig. S1).  
120 Approximately ten proteins were solubilized in NaCl at concentrations of 137 mM  
121 and higher, including MMOB1670, which is known to be a component of the chain  
122 (24). Based on this observation, we isolated the chain particles from *M. mobile* cells  
123 as follows: We suspended the Triton-insoluble fraction of *M. mobile* cells in a buffer  
124 containing 137 mM NaCl to solubilize the chain particles free of contaminating  
125 proteins. The soluble fraction recovered by centrifugation was then subjected to  
126 Superdex 200 gel filtration chromatography. The peak fraction in the void contained  
127 MMOBs 1620, 1630, 1660, and 1670, which are coded on the mycoplasma Type 2

128 ATPase operon, and MMOB4530 annotated as phosphoglycerate kinase (PGK)  
129 (Fig. 2A). These proteins are known to be components of the internal structure (Fig.  
130 1C) (23-26). To examine the assembly of these proteins, we applied the isolated  
131 fraction to gel filtration chromatography using a Sephacryl S-400 HR column, which  
132 can fractionate up to 8000 kDa globular proteins (Fig. 2B). The proteins eluted as a  
133 single peak at a non-void position and were larger than 669 kDa, suggesting that  
134 they form a large complex. The molar ratios of the components were estimated to  
135 be 3.2:2.9:3.0:1.0:2.3 for MMOBs 1670, 4530, 1660, 1630, and 1620, respectively,  
136 from the relative intensity of the SDS-PAGE bands stained by Coomassie brilliant  
137 blue (CBB). We then analyzed the isolated fraction by blue-native (BN) PAGE (Fig.  
138 2C, left). A single band was detected at approximately 1000 kDa, which is  
139 consistent with the gel filtration chromatography results. Next, we applied the band  
140 to an In-gel ATPase activity assay, which detects the activity as a white precipitation  
141 of lead caused by released of inorganic phosphate (Fig. 2C, right). The band with  
142 the complex showed precipitation, indicating ATPase activity. In addition, we  
143 assayed the isolated fraction for phosphate release from solution. The complex  
144 hydrolyzed ATP at a maximum turnover rate of 0.18 molecules/s per MMOB1670  
145 subunit,  $\beta$ -subunit paralog with a  $K_m$  of 74  $\mu$ M at 25°C (Fig. 2D). The ATPase activity  
146 was inhibited by addition of 15.4 mM sodium azide, an inhibitor to ATPases with  
147 Walker A motifs (33), with a  $K_m$  of 108  $\mu$ M and a maximum turnover rate of 0.055  
148 molecules/s. In a previous study, the Triton-insoluble fraction, which included the  
149 internal structure, showed ATPase activity with a  $K_m$  of 66  $\mu$ M and a maximum



150 turnover rate of 0.09 molecules/s and was suppressed by 15.4 mM sodium azide,  
151 showing a  $K_m$  of 84  $\mu$ M and a maximum rate of 0.063 molecules/s (23). The values  
152 obtained here are comparable to these previous data. The above results suggest  
153 that the chain particle is the motor in the internal structure of the gliding machinery.

154 **Hexamers resembling  $F_1$ -ATPase catalytic  $(\alpha\beta)_3$  form a dimer.** We observed  
155 the isolated chain particles by EM using the negative-staining method. A field image  
156 showed uniform particles with axes of 20 and 40 nm (Fig. 3A and B). As the particle  
157 frequency depended on the protein concentration, we concluded that the observed  
158 particles were a part of the protein complex. We picked 2148 particle images  
159 automatically using RELION software (34) for 2D-classification. From the  
160 2D-classification in 100 classes, we obtained four clear particle images (Fig. S2).  
161 We adopted mirror images according to the structure observed in high-speed  
162 atomic force microscopy (HS-AFM) (see below). Structural handedness cannot be  
163 judged from EM images because they are projections of electrons transmitted  
164 through the sample. We focused on an image showing a complex structure with  
165 dimensions of 35 and 26 nm featuring nearly two-fold symmetry (Fig. 3C and D).  
166 Interestingly, the characteristic hexamer of about 12 nm in diameter formed a dimer  
167 and was reminiscent of  $F_1$ -ATPase catalytic  $(\alpha\beta)_3$ . Considering that the amino acid  
168 sequences of MMOBs 1660 and 1670 have high identity to the  $\alpha$ - and  $\beta$ -subunits of  
169  $F_1$ -ATPase, respectively, the dimeric complex is probably evolutionarily related  
170  $F_1$ -ATPase. The distance between the centers of the two hexamers was 11.0 nm.  
171 The complex had ten filamentous structures around the two hexamers, four of which

172 appeared to form bridges across the two hexamers. Hereafter, we refer to this  
173 structural unit as the “motor.”

174 **The hexamer featured a ring and a peak.** Next, we visualized the motor using  
175 HS-AFM to clarify the structure under liquid conditions. HS-AFM is a powerful  
176 method that can visualize the structure and dynamics of single molecules in liquid  
177 conditions at a video rate (35, 36). In this method, a specimen is placed on the  
178 stage surface and with a probe is scanned in buffer at high speed. In this study, we  
179 placed the isolated motor on a mica surface and scanned it in an area of  $70 \times 70$   
180  $\text{nm}^2$  at  $56 \times 56$  pixels with a scanning rate of 100 ms per frame. HS-AFM images  
181 showed a complex with dimensions of approximately 30 and 20 nm composed of  
182 two globules and attached by 2–4 lateral protrusions shorter than 15 nm (Fig. 3E;  
183 Movie S1 and S2). The molecular images were categorized into two patterns as  
184 either a ring (pattern I) or a peak (pattern II), based on the central part. Then, we  
185 observed them at a higher resolution (area,  $40 \times 40 \text{ nm}^2$  with  $50 \times 50$  pixels;  
186 scanning rate, 100 ms per frame) (Fig. 3F). In pattern I, the slice image near the top  
187 end of the motor between 9.8 and 11.3 nm above the substrate surface showed two  
188 hexameric rings (Fig. 3G). The position and direction of the two rings in the dimer  
189 are consistent with those of the hexamers in the negative-staining EM image. In  
190 addition, the distance between the centers of the two hexameric rings was 10.4 nm  
191 (Fig. 3H), in agreement with the distance between the centers of the hexamers in  
192 the negative-staining EM image (Fig. 3C). These observations suggest that the  
193 shape of the motor structure in liquid is preserved in negative-staining EM

194 conditions and that the hexamers form rings like F<sub>1</sub>-ATPase catalytic ( $\alpha\beta$ )<sub>3</sub>. In  
195 pattern II, the two central peaks were positioned 11.2 nm apart (Fig. 3H, lower),  
196 similar to the distance between the centers of the hexameric rings in pattern I (Fig.  
197 3H, upper), suggesting that patterns I and II are two sides of the same coin (Fig. 3E,  
198 left). Interestingly, in most of the particles, the two peaks at 6 and 5 nm became  
199 invisible in 20 s, between frames 1 and 3 (Fig. 3I and J; Movie S3). We concluded  
200 that these subunits dropped out because they did not reappear until the complex  
201 was disrupted. Next, we focused on the lateral protrusions of these particles. To  
202 visualize them more clearly, we scanned the motor by HS-AFM with an area of 120  
203 × 120 nm<sup>2</sup>, 120 × 120 pixels, and scanning rate 500 ms per frame. The motor  
204 showed seven lateral protrusions around the two globules (Fig. 3K). These  
205 protrusions swayed without being fixed (Fig. 3L; Movie S4).

206 **Isolation of F<sub>1</sub>-like ATPase unit.** Next, we treated the isolated motors with  
207 1.5% sodium cholate, an anionic detergent. BN-PAGE and In-gel ATPase activity  
208 assays showed a single band with ATPase activity at a position lower than the  
209 original one, corresponding to 720–1048 kDa, indicating that the motor dissociated  
210 into smaller units with ATPase activity (Fig. 4A). To isolate the ATPase unit, we  
211 applied the motor treated with 1.5% sodium cholate to Sephacryl S-400HR gel  
212 filtration chromatography. The elution pattern showed at least five continuous peaks  
213 with broad peaks (Fig. 4B). The three peaks at elution volume 80–100 mL were 2–4  
214 times larger than those of the other two peaks. These large peaks are thought to be  
215 formed by more than 20 different proteins, as shown by the reverse-stained

216 SDS-PAGE gel (Fig. S3). These proteins are probably rich in tryptophan and  
217 tyrosine residues because the absorbance at 280 nm wavelength was monitored  
218 during gel filtration. A CBB-stained SDS-PAGE gel showed that MMOBs 1670, 1660,  
219 and 1630 eluted in the same fractions, while MMOBs 4530 and 1620 eluted at later  
220 fractions (Fig. 4C), indicating that MMOBs 4530 and 1620 were dissociated from the  
221 motor by sodium cholate treatment.

222 We focused on the F6 fraction, which mainly contained MMOBs 1670, 1660,  
223 and 1630 (Fig. 4D). This complex corresponds to the BN-PAGE band showing  
224 ATPase activity (Fig. 4A), because only MMOBs 1660 and 1670 have the Walker A  
225 and Walker B motifs in the motor components. EM observation using the  
226 negative-staining method showed uniform globular particles 10–15 nm in diameter  
227 (Fig. 4EF). As the particle frequency depended on the protein concentration, we  
228 concluded that the observed particles were a part of the protein complex. We picked  
229 11687 particle images automatically using RELION software for 2D-classification.  
230 By 2D-classifying the images in 50 classes, we obtained 15 clear particle images,  
231 which were averaged (Fig. S4). Fig. 4G shows a 12 nm diameter globule  
232 characterized by a single hexameric ring, corresponding to a part of the motor  
233 image in Fig. 3C. Three of the subunits were larger than the others with hook  
234 structures on either side of the edge. Three averaged images (II–IV) showed a  
235 mushroom-like structure resembling  $F_1$ -ATPase, which is characterized by a 12  
236 nm-diameter umbrella and a 3 nm-long stalk (Fig. 4G). These observations suggest  
237 that MMOBs 1670, 1660, and 1630 form an  $F_1$ -like ATPase unit. MMOB4530 was

238 probably not included in this unit because it probably binds to the complex and  
239 could not be distinguished in the image due to the low proportion of bound entities  
240 (Fig. 4D). Thus, the hexameric ring is likely formed by the  $\alpha$ -subunit homolog  
241 MMOB1660 and the  $\beta$ -subunit homolog MMOB1670, and the stalk is formed by  
242 MMOB1630.

243 **Motor chain structure.** In gliding machinery, motors link to form chains. To  
244 isolate the chain, 387 mM NaCl was added to the Triton-insoluble fraction from *M.*  
245 *mobile* cells. We then applied this fraction to gentle mixing and centrifugation at  
246  $5000 \times g$  for 5 min, milder conditions than that for motor (chain particle) isolation.  
247 The supernatant contained more than 20 proteins, including the motor component  
248 proteins MMOBs 1670, 4530, 1660, 1630, and 1620 as major components (Fig. 5A).  
249 EM observation using the negative-staining method showed chain structures with  
250 lengths longer than 70 nm and particles of various sizes (Fig. 5B and C). This time  
251 we manually picked 2127 particles from the chain images using RELION software,  
252 overlapping approximately 50% of the  $71 \times 71 \text{ nm}^2$  box area. From 2D-classification  
253 in 20 classes, we obtained seven clear particle images (Fig. 5D). The particle  
254 images show the various orientations required for 3D reconstruction. We then  
255 created a 3D map by combining a total of 1709 particle images of good quality (Fig.  
256 5E and S5). The 3D map with dimensions of 70, 20, and 15 nm at a density  
257 threshold (contour level = 0.026) was composed of two dimers of mushroom-like  
258 structures resembling  $F_1$ -ATPase, aligned along the dimer axis (Fig. 5E). The  
259 dimers were connected by a bulge structure with a diameter of 5 nm. The chain

260 interval was 31 nm, consistent with the corresponding dimension in a 2D image  
261 from electron cryotomography (ECT) (23), suggesting that the 3D model obtained  
262 reflects the original structure from a cell. The mushroom-like structure with a  
263 diameter of 15 nm, consisting of a hexameric ring and a central stalk, was  
264 connected to the dimer by two bridge structures with a diameter of 3–6 nm. An  
265 atomic model of F<sub>1</sub>-ATPase catalytic ( $\alpha\beta$ )<sub>3</sub> from *Bacillus* PS3 (PDB ID 6N2Y) (37)  
266 was fitted into each hexameric ring of the mushroom-like structure (Fig. 5F). The  
267 distance between the centers of the fitted ( $\alpha\beta$ )<sub>3</sub> in the dimer was 12.5 nm, which is  
268 in agreement with that of the motor observed by negative-staining EM and HS-AFM  
269 (Fig. 3C and H). The fitted model showed that each hexameric ring had two  
270 protrusions of 3–6 nm pointing laterally (Fig. 5F). The cross-sections of each  
271 mushroom-like structure showed the central stalk length of 5 nm (Fig. 5G). A cavity  
272 was observed at the center of the hexameric ring. However, it may be an artifact of  
273 the low-resolution map of negative-staining EM, because metal coating tends to  
274 emphasize the peripheral part of large particles (38). Next, we compared a  
275 reprojection image of the 3D chain map with the 2D averaged image of the motor  
276 from negative-staining EM (Fig. 5H). Two short filaments marked by asterisks in the  
277 dimer (Fig. 5H, left) are positioned facing each other in the connecting bulge (Fig.  
278 5H). Previously, electron cryotomography (ECT) of a permeabilized *M. mobile* cell  
279 showed a chain structure characterized by repeats of two globules and two types of  
280 projections to the cell membrane (Fig. 5I, left) (23). The hexameric ring and the  
281 central stalk in the 3D map here correspond to the globule and one type of

282 projection to the cell membrane in the ECT image, respectively, suggesting that the  
283 chain is oriented with the central stalk facing the membrane, which is common in  
284 F<sub>1</sub>-ATPases. At the interface between the motors, the 3D map here did not include a  
285 structure composed of another type of projection and a globule as observed in the  
286 ECT image. The subunits corresponding to these structures probably had structural  
287 variations or dissociation during the isolation process.

288

## 289 **Discussion**

290 **Outline of internal structure of gliding machinery.** Previously, sequence  
291 analysis suggested that the chain of *M. mobile* gliding machinery evolved from  
292 F<sub>1</sub>-ATPase (5, 23-26). The present study supports this conclusion by structural data  
293 showing that the chain has hexameric rings similar to the F<sub>1</sub>-ATPase catalytic ( $\alpha\beta$ )<sub>3</sub>.  
294 Integrating available information, we can now describe the outline of the internal  
295 structure of *the M. mobile* gliding machinery (Fig. 1B). *M. mobile* cells have 28  
296 individual 530 nm long chains, each of which contains 17 motor units composed of  
297 two F<sub>1</sub>-like ATPases and filamentous structures (23). The central stalk of the F<sub>1</sub>-like  
298 ATPase and another protrusion from the connecting bulge project to the cell  
299 membrane.

300 **Unique role of F<sub>1</sub>-ATPase related complex.** To date, several complexes are  
301 known to be evolutionarily related to F<sub>1</sub>-ATPase, all of which are responsible for  
302 transporting substances across the membrane (39). However, the motor we

303 identified here most likely plays a role in motility. This case may be reminiscent of  
304 dynein, a motor in eukaryotes, which evolved from a widely conserved AAA  
305 (ATPases associated with diverse cellular activities)+ protein, in which multiple  
306 subunits of ATPases perform functional rotation (40, 41). Sequence analyses have  
307 shown that mycoplasma Type 3 ATPase is also related to F<sub>1</sub>-ATPase, and its role  
308 has been suggested to promote substrate turnover in the MIB-MIP system (31). If  
309 Type 3 ATPase provides the force to change the conformation of a hydrolytic  
310 enzyme, its role in force generation is common with Type 2, the gliding motor.  
311 F<sub>1</sub>F<sub>o</sub>-ATPases are known to be dimerized through interactions between  
312 F<sub>o</sub>-domains and are usually arranged in rows along the short axis in the tightly  
313 curved cristae ridges of mitochondria (29, 42, 43). The dimer structure found in the  
314 present study is not related to this, because the F<sub>1</sub>-like domain is dimerized through  
315 the filament structure and is linked in the long axis direction. However, some roles  
316 may be common in part if the dimerization and chain formation observed in the  
317 gliding motor identified in this study stabilizes the membrane structure, as seen in  
318 the F<sub>1</sub>F<sub>o</sub>-ATPase dimer (44). Moreover, dimerization may result in cooperativity in  
319 motor functions. The gliding motor here is mostly a two-rotational symmetrical  
320 structure, whereas gliding occurs unidirectionally. The directionality may be  
321 provided by the surface part of the gliding machinery rather than the gliding motor  
322 itself. In fact, the binding of cells to sialic acids is known to have directionality, which  
323 is probably provided by the foot of Gli349 (14, 16, 45).

324 **Protein assignment.** The  $\alpha$ -subunit homolog MMOB1660 (58.7 kDa) and the



325  $\beta$ -subunit homolog MMOB1670 (88.4 kDa) likely correspond to the smaller and  
326 larger subunits, respectively, of the hexameric ring of an  $F_1$ -like ATPase unit, as  
327 suggested by the estimated 1:1 molar ratio in the motor (Fig. 2B). This means that  
328 the hook structure of the larger subunit may be formed by the extra N-terminal  
329 region (34.8 kDa) of MMOB1670. Previously, 3D structure modeling based on  
330 secondary structure suggested that MMOB1630 is structurally similar to the  $\gamma$   
331 subunit, the principal component of the central stalk of  $F_1$ -ATPase (5). In general,  
332 the  $\gamma$  subunit of  $F_1$ -ATPase is composed of a coiled-coil and a globular domain and  
333 penetrates the hexameric ring (46). In the  $F_1$ -like ATPase unit and chain 3D model,  
334 a stalk structure, suggesting the globular domain of the  $\gamma$  subunit, was found in the  
335 center of the hexameric ring (Fig. 4G and 5G), implying that MMOB1630 penetrates  
336 the hexameric ring like the  $\gamma$  subunit.

337 Using HS-AFM observations, the peak at approximately 5 nm at the center of the  
338 hexameric ring dropped out with time (Fig. 3I). The peak height agrees with the  
339 length of the estimated globular domain of MMOB1630 in the chain 3D model (Fig.  
340 3J and 5G), suggesting that the peak is composed of MMOB1630 and was pulled  
341 out from the hexameric ring by the scanning cantilever during HS-AFM observation.  
342 The pull-out event is thought to be common to that of the  $F_1$ -ATPase, in which the  $\gamma$   
343 subunit is removed from the hexameric ring by optical tweezers (47). The  
344 filamentous structures around the hexameric ring probably correspond to lateral  
345 protrusions in the HS-AFM images and are formed by the remaining proteins,  
346 MMOB1620 and MMOB4530 (PGK). These proteins probably play roles in ATPase

347 dimerization, chain formation, and chain bundling (23). MMOB1620 is an  
348 unannotated protein specific to the Type 2 ATPase cluster (26, 30). MMOB4530 is  
349 annotated as an enzyme that transfers phosphate groups from  
350 1,3-bisphosphoglycerate to ADP in glycolysis to yield ATP and 3-phosphoglycerate  
351 (48). In *M. mobile*, ATP is probably provided by glycolysis (49). MMOB4530 may  
352 supply ATP efficiently to the gliding motor by its close proximity. Yeast V-ATPase,  
353 which belongs to the rotary ATPase family like F<sub>1</sub>F<sub>o</sub>-ATPase, is also attached by two  
354 glycolytic enzymes, 6-phosphofructo-1-kinase and aldolase (50-52). These  
355 glycolytic enzymes are involved in the regulation of V-ATPase assembly and  
356 activity.

357 **Possible force transmission mechanisms for gliding.** The involvement of an  
358 internal ATPase in the gliding mechanism is based on the following five  
359 observations from the analysis of the "gliding head" of *M. mobile* protrusions and of  
360 the isolated gliding machinery: (a) The affinity for ATP is comparable in the ATPase  
361 activity of the internal structure and the speed of the gliding head (23). (b) Substrate  
362 binding and gliding speed of the gliding head are inhibited by azide, as well as the  
363 ATPase activity of the internal structure (23). (c) The chain in the internal structure  
364 undergoes conformational changes based on ATP hydrolysis (23, 32). (d) Among  
365 the 21 proteins identified from the gliding head, only MMOBs 1660 and 1670 could  
366 be suggested for ATPase from the amino acid sequences alone (23, 24). (e)  
367 Fluorescent protein tagging of components of the internal structure significantly  
368 affects the binding activity and gliding speed of *M. mobile* cells (26).

369 The structure elucidated in the present study allows us to discuss the gliding  
370 mechanism in more detail. In  $F_1$ -ATPase, the three catalytic sites in the hexameric  
371 ring cooperatively hydrolyze ATP, and each catalytic  $\beta$ -subunit undergoes a bending  
372 motion that drives the rotation of the central stalk (46). Previously, structural  
373 changes linked to ATP hydrolysis were reported: (I) EM studies showed 2 nm  
374 contraction of particle intervals in the isolated chains (23), and (II) HS-AFM studies  
375 showed movements of individual motors in the cell 9 nm perpendicular to the chain  
376 long axis and 2 nm into the cell (32). Considering these observations, we propose  
377 two different working models for the force transmission mechanism in gliding (Fig.  
378 6). In the “contraction model” (Fig. 6 i), the force generated by the hexameric ring  
379 shortens the chain. The resulting displacement of the projections from the motor to  
380 the cell membrane drives the hook structure of Gli521 like a “lever.” Then, the leg  
381 moves with the catch, pull, and release of the SOs. In the “rotation model” (Fig. 6 ii),  
382 the force generated by the hexameric ring rotates MMOB1630 in the same way as  
383  $F_1$ -ATPase. This rotation is transmitted across the cell membrane to the Gli521. The  
384 hook structure converts rotational motion into linear motion of the leg, similar to a  
385 crank. Previous studies have reported that *M. mobile* exhibits unitary steps of  
386 approximately 70 nm in size at no load (53, 54). In our models, both the rotation and  
387 contraction displacements are expected to be a few nanometers. These  
388 displacements may be amplified by the large surface structure complex formed by  
389 the 100 nm long Gli349 and 120 nm long Gli521, which show dimensions  
390 comparable to the step size, acting as a large gear (22). This conjecture could

391 explain how a single leg exerts a force of 1.5 pN, smaller than that of conventional  
392 motor proteins such as myosin, dynein, and kinesin.

393 **Evolution of *M. mobile* gliding.** A previous study suggested that Gli349 evolved  
394 from a static binding receptor to parasitize the host (16). Considering this, the  
395 evolutionary origin of *M. mobile* gliding can now be discussed. F<sub>1</sub>F<sub>o</sub>-ATPase, which  
396 is abundant on the cell membrane, could have been accidentally associated with  
397 the binding receptor and turned into a primitive motility system, which may have  
398 provided random cell spreading. The system was then refined under survival  
399 pressure, because motility might be beneficial to infection and evading the host's  
400 immune system. For dimerization and chain formation, PGK was then incorporated  
401 into the gliding machinery, because PGK was working in close proximity to  
402 F<sub>1</sub>F<sub>o</sub>-ATPase.

403

## 404 **Materials and Methods**

405 **Strains and culture conditions.** We used P476R *gli521*, a mutant strain of *M.*  
406 *mobile* that can glide normally but binds SOs more tightly than wild-type strains (10,  
407 22, 55). *M. mobile* cells were cultured as described previously (56, 57).

408 **Optical microscopy.** The cultured cells were inserted into a tunnel chamber  
409 assembled with two coverslips and double-sided tapes and observed by  
410 phase-contrast microscopy using an inverted microscope (IX71; Olympus, Tokyo,  
411 Japan) (17, 19). Movement was recorded using a complementary metal-oxide  
412 semiconductor (CMOS) camera (DMK33UX174; The Imaging Source, Bremen,

413 Germany). Video was analyzed using the ImageJ software, version 1.53a

414 (<http://rsb.info.nih.gov/ij/>).

415 **Chain particle isolation.** All procedures were performed at 4°C unless  
416 otherwise noted. To investigate the solubility of the chain particle, *M. mobile* cells  
417 from 60 mL of culture medium were collected by centrifugation at 14000 × *g* for 20  
418 min and washed twice with PBS consisting of 8.1 mM Na<sub>2</sub>HPO<sub>4</sub>, 1.5 mM KH<sub>2</sub>PO<sub>4</sub>,  
419 pH 7.3, 2.7 mM KCl and 137 mM NaCl. Cells were resuspended in PBS to a 12-fold  
420 higher concentration than the culture and sonicated for 1 min at 24–27°C to be  
421 dispersed in microtubes using an ultrasonic generator (2510 J-MT; BRANSON,  
422 Kanagawa, Japan). The cells were then treated with Triton solution (1% Triton  
423 X-100, 0.1 mg/mL DNase, 5 mM MgCl<sub>2</sub>, and 1 mM phenylmethylsulfonyl fluoride in  
424 PBS) in a total volume of 10 mL. After gentle shaking for 30 min, the suspensions  
425 were centrifuged at 20000 × *g* for 20 min, and pellets were collected and washed  
426 once with suspension buffer, PBS with 5 mM MgCl<sub>2</sub>. Pellets were then resuspended  
427 in suspension buffer with 0 to 400 mM NaCl by pipetting several times. After  
428 overnight treatment, suspensions were centrifuged at 20000 × *g* for 20 min, and  
429 supernatants and pellets collected for SDS-PAGE analysis.

430 For isolation of chain particles, *M. mobile* cells from 1.2-liter cultures were  
431 collected by centrifugation at 14000 × *g* for 30 min and washed three times with  
432 PBS. The cells were resuspended in PBS to a 100-fold higher concentration than  
433 the culture and sonicated for 1 min using an ultrasonic generator at 24–27°C. The  
434 cells were treated with 0.05 mg/mL RNase in Triton solution in a total volume of 207

435 mL. After 1 h of gentle shaking, the suspension was centrifuged at  $20000 \times g$  for 20  
436 min, and pellets were washed once with suspension buffer. Pellets were then  
437 resuspended in suspension buffer by pipetting up and down and allowed to dissolve  
438 overnight. The soluble fraction was collected by centrifugation at  $20000 \times g$  for 20  
439 min and loaded onto a HiLoad 16/600 Superdex 200 column (Cytiva, Tokyo, Japan)  
440 equilibrated with 1 mM  $MgCl_2$  in PBS at a flow rate of 0.8 mL/min. The fractions  
441 were analyzed by SDS-PAGE and CBB staining. Focused protein bands were  
442 identified by PMF, as previously reported (24, 58), and the chain particle fraction  
443 was recovered.

444 We modified this procedure to isolate the  $F_1$ -like ATPase unit. The washed *M.*  
445 *mobile* cells were treated with Triton solution in a total volume of 207 mL. After 1 h  
446 of gentle shaking, the suspension was centrifuged at  $20000 \times g$  for 20 min, and the  
447 pellet was washed once with suspension buffer. The pellet was suspended in 20  
448 mM Tris-HCl (pH 7.5), 250 mM NaCl, 1 mM phenylmethylsulfonyl fluoride, and 1  
449 mM  $MgCl_2$  with pipetting as before and allowed to dissolve overnight. The soluble  
450 fraction was collected by centrifugation at  $20000 \times g$  for 20 min and mixed with 2%  
451 (w/v) sodium cholate. After 7 h of incubation, the complexes were loaded onto a  
452 Sephacryl S-400 HR column (Cytiva) equilibrated with 0.7% sodium cholate, 20 mM  
453 Tris-HCl (pH 7.5), 250 mM NaCl, and 1 mM  $MgCl_2$  at a flow rate of 0.5 mL/min. The  
454 elution curve was fitted using Igor Pro 6.34j (WaveMetrics, Lake Oswego, OR, USA).  
455 The fractions were analyzed by SDS-PAGE and CBB- and reverse-staining (59, 60).  
456 The fraction of the complex composed of MMOBs 1670, 1660, and 1630 was

457 collected. Samples were concentrated using an Amicon Ultra 100 K spin filter  
458 (Merck KGaA, Darmstadt, Germany), if necessary.

459 **Isolation of chain.** All procedures were performed at 4°C. *M. mobile* cells from  
460 15 mL of culture medium were collected as a pellet by centrifugation at 14000 × *g*  
461 for 25 min and washed twice with PBS. Cells were resuspended in PBS to a  
462 100-fold higher concentration than the culture and sonicated for 1 min at 24–27°C in  
463 microtubes using an ultrasonic generator. The cells were then treated with Triton  
464 solution as above in a total volume of 300 µL. After gentle shaking for 30 min, the  
465 suspension was centrifuged at 20000 × *g* for 20 min, and the pellet containing the  
466 internal structures was resuspended in suspension buffer. The suspension was then  
467 gently mixed with an equal volume 500 mM NaCl in suspension buffer. The chain  
468 was recovered as the supernatant by centrifugation at 5000 × *g* for 5 min.

469 **Analytical gel filtration.** The isolated chain particle solution was loaded onto a  
470 Sephacryl S-400 HR column equilibrated with gel filtration buffer containing 20 mM  
471 Tris-HCl (pH 7.5), 200 mM NaCl and 1 mM MgCl<sub>2</sub> at a flow rate of 0.5 mL/min at 4°C.  
472 Thyroglobulin (669 kDa; Gel Filtration Calibration Kits; Cytiva) was dissolved in gel  
473 filtration buffer and loaded onto the column as a size standard at a flow rate of 0.5  
474 mL/min. The stoichiometry of protein complexes was estimated by densitometry of  
475 SDS-PAGE gels stained with CBB, using a scanner (GT-9800F; Epson, Nagano,  
476 Japan) and ImageJ (9).

477 **BN-PAGE and in-gel ATPase activity assays** BN-PAGE was performed  
478 according to the user manual of the Native PAGE Novex Bis-Tris Gel System

479 (Thermo Fisher Scientific, Waltham, MA). For BN-PAGE of the F<sub>1</sub>-like ATPase unit,  
480 the isolated chain particle (motor) fraction was mixed with sodium cholate (1.5%)  
481 and incubated at 4°C for 9 h. When this sample was mixed with a sample buffer,  
482 NativePAGE™ 5% (w/v) G-250 sample additive was also added at 0.5% (w/v) to  
483 prevent protein aggregation. Thyroglobulin was dissolved in water and used as a  
484 negative control for the In-gel ATPase activity assay. For the In-gel ATPase activity  
485 assay (61, 62), native gels were incubated with gentle shaking overnight at 24–  
486 27°C in activity buffer containing 270 mM glycine, 35 mM Tris (pH 8.4), 4 mM ATP,  
487 14 mM MgSO<sub>4</sub>, and 0.2% (w/v) Pb(NO<sub>3</sub>)<sub>2</sub>. The gels were rinsed once with water and  
488 images were taken using ImageQuant LAS 4000 mini (Cytiva). White precipitates  
489 were then dissolved by gentle shaking overnight at 24–27°C with 50% (v/v)  
490 methanol and 10% (v/v) acetic acid in water. The gels were restained with 0.025%  
491 (w/v) CBB G-250 and 10% acetic acid in water for 80 min at 24–27°C with gentle  
492 shaking and destained with 10% (v/v) ethanol and 10% acetic acid in water for 180  
493 min at 24–27°C with gentle shaking. The gels were rinsed once with water and  
494 images were taken using ImageQuant LAS 4000 mini.

495 **Phosphate-release assay** The isolated chain particle solution was dialyzed  
496 overnight using 20 mM Tris-HCl (pH 7.5), 150 mM NaCl, and 2 mM MgCl<sub>2</sub>. ATPase  
497 activity was assayed by a continuous spectrophotometric method using a  
498 2-amino-6-mercapto-7-methylpurine ribonucleoside–purine nucleoside  
499 phosphorylase reaction to detect released inorganic phosphate (EnzChek kit;  
500 Thermo Fisher Scientific) (63). The reaction mixture was as follows: 15.7 nM motor,



501 20 mM Tris-HCl (pH 7.5), 150 mM NaCl, 2 mM MgCl<sub>2</sub> and 0.01–1 mM ATP in a total  
502 volume of 0.2 mL at 25°C. Sodium azide was added to 15.4 mM final concentration  
503 when the reaction was started. The protein amount of the MMOB1670 comprising  
504 F<sub>1</sub>-ATPase β-subunit paralogs was estimated using densitometric of SDS-PAGE.

505 **Negative-staining EM and image processing.** The isolated chain particle  
506 solution was placed on a glow-discharged (PIB-10; VACUUM DEVICE, Ibaraki,  
507 Japan) carbon-coated grid (F-400; Nisshin EM Co., Tokyo, Japan) and incubated for  
508 1 min at 24–27°C. The solution was then removed, and the grid was stained with  
509 2% uranyl acetate (w/v) for 30 s. The stain was then removed, and the grid was  
510 air-dried. To observe the F<sub>1</sub>-like ATPase unit and the chain, the grids were washed  
511 with water after 1 min of incubation and then treated as described for the isolated  
512 chain particle solution. Samples were observed using a transmission EM (JEM1010,  
513 JEOL) at 80 kV, equipped with a FastScan-F214 (T) charge-coupled-device (CCD)  
514 camera (TVIPS, Gauting, Germany), and images were captured at 2.58 Å/pix.

515 The contrast transfer function parameters for electron micrographs were  
516 estimated using Gctf (64). Further image processing was performed using RELION  
517 3.0 (34). A total of 2148 particles for the chain particle and 11687 particles for the  
518 F<sub>1</sub>-like ATPase unit were automatically selected with box sizes of 180 × 180 and  
519 100 × 100 pixels, respectively. These particle images were binned to 5.16 Å/pix. For  
520 the chain particle, the particle images were 2D-classified into 100 classes. For the  
521 F<sub>1</sub>-like ATPase unit, particle images were 2D-classified in four rounds, and the  
522 selected 7381 particles were re-extracted with the pixel size returned to the

523 unbinned image and then 2D-classified into 50 classes.

524 For reconstruction of the 3D chain structure, 2127 particles were manually  
525 selected for chains with a box size of  $276 \times 276$  pixels with ~50% overlap. These  
526 particle images were binned to 5.16 Å/pix. Particle images were 2D-classified in two  
527 rounds, and the selected 1709 particles were used to reconstruct the initial model  
528 with a final resolution limit of 50 Å. The initial model and selected particles were  
529 used to perform 3D refinement. Reprojection images were produced from the 3D  
530 map using the `relion_project` command in RELION. The 3D map was visualized  
531 using UCSF Chimera 1.14 (65). Atomic models of F<sub>1</sub>-ATPase catalytic ( $\alpha\beta$ )<sub>3</sub> from *B.*  
532 *subtilis* (PDB ID 6N2Y) were fitted into the 3D map using command of “Fit in map” in  
533 UCSF Chimera.

534 **HS-AFM.** Imaging was performed with a laboratory-built tapping mode HS-AFM  
535 (66, 67), using small cantilevers (BLAC10DS-A2, Olympus; resonant frequency,  
536 ~0.5 MHz in water; quality factor, ~1.5 in water; spring constant, ~0.1 N/m). The  
537 cantilever’s free-oscillation peak-to-peak amplitude ( $A_0$ ) and set-point amplitude  
538 were set at ~2.5 nm and  $\sim 0.8 \times A_0$ , respectively. The probe tip was grown on the  
539 original tip end of a cantilever through electron beam deposition and further  
540 sharpened using a radio frequency plasma etcher (PE-2000, South Bay Technology,  
541 Redondo Beach, CA) under an argon gas atmosphere (typically at 180 mTorr and  
542 15 W for 3 min). The sample was deposited on a freshly cleaved mica disc glued to  
543 a glass stage beforehand. After 3.5 min, the stage surface was immersed in a liquid  
544 cell containing an observation buffer [20 mM Tris-HCl (pH 7.5), 50 mM KCl, 2 mM

545 MgCl<sub>2</sub>]. Imaging was performed at 24–27°C. AFM images were processed using a  
546 low-pass filter to remove spike noise and make the xy-plane flat and analyzed using  
547 Kodec software (version 4.4.7.39) (68). Surface profiles and smoothing were  
548 performed using ImageJ software.

549

## 550 **Acknowledgments**

551 We thank Toshiaki Arata, Ikuko Fujiwara, Kohei Kobayashi, and Hiroki Sato at the  
552 Graduate School of Science, Osaka City University, and Takayuki Uchihashi at the  
553 Department of Physics and Structural Biology Research Center, Nagoya University,  
554 for helpful discussions. We also thank Aya Takamori at the Graduate School of  
555 Science, Osaka City University, for performing MALDI-TOF MASS spectrometry. TT  
556 learned RELION software in an instruction course on 20180927–28 provided by the  
557 Cyclic Innovation for Clinical Empowerment (CiCLE) from AMED.

558 This work was supported by a Grant-in-Aid for Scientific Research on the Innovative  
559 Area "Harmonized Supramolecular Motility Machinery and Its Diversity" (MEXT  
560 KAKENHI Grant Number JP24117002), by a Grants-in-Aid for Scientific Research  
561 (B) and (A) (MEXT KAKENHI Grant Numbers JP24390107, JP17H01544), by JST  
562 CREST Grant Number JPMJCR19S5, Japan, by the Osaka City University (OCU)  
563 Strategic Research Grant 2018 for top priority researches and by a Grant-in-aid of  
564 the FUGAKU TRUST FOR MEDICINAL RESEARCH to MM, and JSPS KAKENHI  
565 (Grant Number JP25000013), the Platform Project for Supporting Drug Discovery

566 and Life Science Research (BINDS) from AMED (Grant Number JP19am0101117  
567 and support number 1282), CiCLE (Grant Number JP17pc0101020), and JEOL  
568 YOKOGUSHI Research Alliance Laboratories of Osaka University to KN.

569

## 570 **Figure Legends**

571 **FIG 1. Gliding machinery of *Mycoplasma mobile*.** (A) Optical microscopy of cells  
572 (upper) and trajectories of gliding cells (lower). The gliding direction is indicated by a  
573 black arrow. The 4-second trajectory is colored from red to blue. (B) Schematic  
574 illustration of gliding machinery based on the present study. In the whole cell shown  
575 in upper illustration, the internal structure and legs are colored gray and red,  
576 respectively. The actual cell has about 28 chains, each consisting of 17 particles,  
577 although a more limited number is illustrated here. A single unit of the surface  
578 structure and a chain of the internal structure are magnified in the lower illustration.  
579 “Motor” is identical to “chain particle.” (C) ORFs for the internal structure. The  
580 components of the internal structure are colored gray. Type 2 ATPase operon is at  
581 the top. Motor components revealed in the present study are marked by colored  
582 boxes, corresponding to the colored components of the lower illustration in panel B.

583

584 **FIG 2. Isolation profile and characterization of chain particle.** (A) Protein profile  
585 of each fraction. The fractions were subjected to SDS-12.5% PAGE gel and stained  
586 with CBB. Lane 1, lysate of *M. mobile* cells; lane 2, Triton-soluble fraction; lane 3,  
587 Triton-insoluble fraction; lane 4, supernatant after incubation in a buffer containing

588 137 mM NaCl; lane 5, peak fraction of Superdex 200 gel filtration chromatography.  
589 The bands of the chain particle components are marked by black triangles.  
590 Molecular masses are shown on the left. (B) Gel filtration assay using Sephacryl  
591 S-400 HR column. The peak position of thyroglobulin (669 kDa) is marked by a  
592 purple triangle. The peak fraction of the chain particles marked by an orange  
593 triangle was analyzed by SDS-12.5% PAGE. The bands of the chain particle  
594 components are marked by black triangles. (C) BN-PAGE (left) and In-gel ATPase  
595 activity assay (right). Isolated chain particle and thyroglobulin, which has no ATPase  
596 activity, were subjected to 3 to 12% gradient BN-PAGE. The band positions of the  
597 chain particle and thyroglobulin are marked by black and open triangles,  
598 respectively. White precipitates, indicating ATPase activity, appeared only at the  
599 band position of the chain particle. Molecular masses are shown on the left. (D)  
600 Phosphate release assay under various ATP concentrations with and without  
601 sodium azide. The ATPase activities under 0- and 15.4-mM sodium azide are  
602 marked by red and green filled circles, respectively ( $n = 3$ ). These data were fitted  
603 by the Michaelis-Menten equation as solid lines.

604

605 **FIG 3. Negative-staining EM and HS-AFM of chain particle (motor).** (A) Electron  
606 micrograph of negatively stained chain particles. (B) Images of individual particles.  
607 (C) Representative 2D averaged image. A mirror image is shown to match the  
608 orientation of the hexameric ring observed by HS-AFM. (D) Illustration based on the  
609 averaged image in panel C. Filamentous structures are marked by asterisks at an

610 end. The double-headed arrow shows the distance between the centers of the  
611 hexamers. (E) Two patterns of HS-AFM images. The motor (chain particle) was  
612 scanned at  $56 \times 56$  pixels in an area of  $70 \times 70 \text{ nm}^2$  with a scanning rate of 100 ms  
613 per frame. Illustrations for patterns I and II (left side) were depicted based on 3D  
614 chain model shown in Fig. 5. Observation directions are indicated by arrows.  
615 Protrusions are marked by blue triangles. Images of patterns I and II are shown in  
616 green and purple frames, respectively. (F) Averaged images for patterns I (green  
617 frame) and II (purple frame). The motor was scanned at  $50 \times 50$  pixels in an area of  
618  $40 \times 40 \text{ nm}^2$  with a scanning rate of 100 ms per frame. The images were produced  
619 by averaging three successive video frames. (G) HS-AFM slice image showing two  
620 hexameric rings (upper) and averaged EM image (lower). Upper: The red broken  
621 boxed area in panel F was sliced for the height 9.8–11.3 nm from the substrate  
622 surface, processed for smoothing, and magnified. The angle alignments of two  
623 hexamers are schematically shown in the left upper. Lower: The central part of  
624 panel C was excised and aligned to compare with the upper panel. Subunits of the  
625 hexamer are marked by red circles. (H) Surface profiles along the lines in pattern I  
626 (green) and II (purple). The upper and lower images in panel F were each profiled at  
627 the green and purple lines passing the globule centers. The dimples and the peaks  
628 are marked by open and black triangles, respectively. (I) Shedding process of the  
629 peaks of pattern II particle shown in panel E. The peaks are marked by red triangles.  
630 (J) Surface profile showing the disappeared peaks. The images in panel I were  
631 each profiled at the clear blue, brown, and gray lines passing the globule centers.

632 The peaks are marked by black triangles. The double-headed arrows show the  
633 peak heights. (K) HS-AFM image of the motor with seven lateral protrusions. The  
634 motor was scanned at  $120 \times 120$  pixels in an area of  $120 \times 120 \text{ nm}^2$  with a scanning  
635 rate of 500 ms per frame. Lateral protrusions are indicated by blue triangles. (L)  
636 Fluctuations of the protrusions of the particle shown in panel K. The images were  
637 sliced for the height 0–7.0 nm from the substrate surface. The moving directions are  
638 indicated by arrows. In all HS-AFM images, the color bar on the right shows the  
639 range of image heights.

640

641 **FIG 4. Isolation of F<sub>1</sub>-like ATPase unit.** (A) BN-PAGE of motors (chain particles)  
642 treated with 1.5% sodium cholate (left) and In-gel ATPase activity assay (right).  
643 Motors, motors treated with 1.5% sodium cholate (SC treatment), and thyroglobulin  
644 were subjected to 3 to 12% gradient BN-PAGE. The band of the motor is marked by  
645 a black triangle. The band of the ATPase unit revealed by sodium cholate treatment  
646 is indicated by an open triangle. The white lead phosphate bands indicate ATPase  
647 activity. Molecular masses are shown on the left. (B) Gel filtration assay using a  
648 Sephacryl S-400 HR column. The light blue lines show a Gaussian fit. (C) The F1–  
649 F13 fractions in the gel filtration assay indicated by the green line in panel B were  
650 subjected to SDS-12.5% PAGE and stained with CBB. Bands for motor components  
651 are marked by black triangles. (D) Comparison of band patterns between F6 and  
652 the motor on CBB-stained SDS-12.5% PAGE. The position of F6 in the elution  
653 volume is marked by a green triangle in panel B. (E) Electron micrograph of

654 negatively stained ATPase in F6. (F) Images of individual particles. (G)  
655 Representative 2D averaged images (upper) and depictions of their structures  
656 (lower). Upper: Hook structures in the hexameric ring and the stalks are marked by  
657 green and orange triangles, respectively. Lower: The hexameric part, hook  
658 structures and the stalk are colored rose, green and orange, respectively.

659

660 **FIG 5. Motor chain structure.** (A) Protein profile of chain fraction. CBB-stained  
661 SDS-12.5% PAGE image of the crude chain fraction. The bands of motor  
662 components, MMOBs 1670, 4530, 1660, 1630, and 1620 are marked by black  
663 triangles from upper to lower. (B) Electron micrograph of negatively stained chains.  
664 The chain structures are marked by blue lines. (C) Magnified chain images. (D)  
665 Representative 2D averaged images. (E) Three-dimensional reconstruction of chain  
666 containing two F<sub>1</sub>-like ATPase dimers. The 3D map is visualized at a density  
667 threshold (contour level = 0.026). The central stalks are marked by open triangles.  
668 (F) Superposition of the atomic model of *Bacillus* F<sub>1</sub>-ATPase catalytic ( $\alpha\beta$ )<sub>3</sub> (PDB ID  
669 6N2Y) (37) onto the 3D chain structure. The  $\alpha$  and  $\beta$  subunits are colored salmon  
670 and turquoise, respectively. The central stalk and protrusions from hexameric rings  
671 are marked by open and black triangles, respectively. (G) Cross section of  
672 mushroom-like structures. Central stalks are marked by broken circles. The  
673 double-headed arrow shows the length of the protrusion. Corresponding  
674 mushroom-like structures are marked (a)–(d) in panel F. (H) Comparison between  
675 the motor image from Fig. 3C (left) and the chain reprojection (middle). The



676 reprojected image is viewed from the angle used for the right image of panel E.  
677 Short filaments corresponding to the position of the connecting bulge are marked by  
678 asterisks. A depiction of the chain model based on the comparison (right). (I)  
679 Comparison between the averaged chain image from ECT (left) and the chain  
680 reprojection (middle). Left image was modified from (23). The chain was reprojected  
681 from an angle close to the middle image in panel E. Inner sides and membrane  
682 relative to the chain are marked by i and m, respectively. The protrusion from the  
683 globule corresponding to the central stalk from the hexameric ring, one from the  
684 connecting bulge and the globule attached to the connecting bulge are marked by  
685 orange, light blue and green triangles, respectively. The areas of image densities  
686 that were visualized only in the ECT image are marked by broken lines. An  
687 illustration depicts a chain model based on the comparison (right).

688

689 **FIG 6. Working models for force transmission mechanism.** The gliding direction  
690 is indicated by a red arrow. The regions marked in gray were visualized only in the  
691 ECT image. The crank protein Gli521 and the leg protein Gli349 are colored green  
692 and red, respectively. (i) Contraction model: The force generated by the hexameric  
693 ring displaces the motor along the gliding direction. The displacements are  
694 transmitted through the membrane to Gli521. (ii) Rotation model: The force  
695 generated by the hexameric ring rotates the central stalk in a mechanism similar to  
696 that of  $F_1$ -ATPase. The rotational motion is transmitted across the membrane to  
697 Gli521. The generation and transmission of forces are presented by black arrows for

698 both models.

699

700 **FIG S1 Conditions to solubilize chain particle.** The Triton-insoluble fraction was  
701 treated with buffers containing the specified concentrations of NaCl and centrifuged.  
702 The Triton-insoluble fraction (TI), the supernatants (S) and the pellets (P) were  
703 analyzed by SDS-12.5% PAGE. MMOB1670, a component of the chain, is marked  
704 by a black triangle. Molecular masses are shown on the left.

705

706 **FIG S2 Two-dimensional averaged images of chain particle obtained by**  
707 **negative-staining EM.** Four classes of clear particle images from 20 classes are  
708 represented. As mentioned in Fig. 3C, they were mirrored.

709

710 **FIG S3 Protein profiles of gel-filtration fractions visualized by reverse-staining**  
711 **method.** Motor components are marked by black triangles on the right. Molecular  
712 masses are shown on the left. Fractions F10–F13 correspond to the first half of the  
713 large three peaks in the elution volume from 80–100 mL shown in Fig. 4B.

714

715 **FIG S4 Two-dimensional averaged images of globular complex in F6.** Fifteen  
716 classes of clear particle images from 50 classes are represented.

717

718 **FIG S5 Reprojection images of chain.** Two-dimensional averaged images (upper)  
719 and the corresponding reprojection images (lower) calculated from the 3D map of

720 the chain are compared.

721

722 **Movie S1 HS-AFM movie showing pattern I particles** The particles were scanned  
723 at 10 fps. The scanning field was  $70 \times 70 \text{ nm}^2$  with  $56 \times 56$  pixels. The video was  
724 played at 10 fps.

725

726 **Movie S2 HS-AFM movie showing pattern II particles** The particles were  
727 scanned at 10 fps. The scanning field was  $70 \times 70 \text{ nm}^2$  with  $56 \times 56$  pixels. The  
728 video was played at 10 fps.

729

730 **Movie S3 HS-AFM movie showing the shedding process of the peaks.** The  
731 particles were scanned at 10 fps. The scanning field was  $70 \times 70 \text{ nm}^2$  with  $56 \times 56$   
732 pixels. The video was played at 10 fps. The peaks are indicated by the red triangles.

733

734 **Movie S4 HS-AFM movie showing fluctuations in protrusions.** The particles  
735 were scanned at 2 fps. The scanning field was  $120 \times 120 \text{ nm}^2$  with  $120 \times 120$  pixels.  
736 The video was played at 1 fps. The protrusions are indicated by the red triangles.

737

## 738 **References**

- 739 1. Razin S, Hayflick L. 2010. Highlights of mycoplasma research--an historical  
740 perspective. *Biologicals* 38:183-90.
- 741 2. Grosjean H, Breton M, Sirand-Pugnet P, Tardy F, Thiaucourt F, Citti C, Barre  
742 A, Yoshizawa S, Fourmy D, de Crecy-Lagard V, Blanchard A. 2014.

- 743 Predicting the minimal translation apparatus: lessons from the reductive  
744 evolution of mollicutes. *PLoS Genet* 10:e1004363.
- 745 3. Miyata M, Robinson RC, Uyeda TQP, Fukumori Y, Fukushima SI, Haruta S,  
746 Homma M, Inaba K, Ito M, Kaito C, Kato K, Kenri T, Kinoshita Y, Kojima S,  
747 Minamino T, Mori H, Nakamura S, Nakane D, Nakayama K, Nishiyama M,  
748 Shibata S, Shimabukuro K, Tamakoshi M, Taoka A, Tashiro Y, Tulum I, Wada  
749 H, Wakabayashi KI. 2020. Tree of motility - A proposed history of motility  
750 systems in the tree of life. *Genes Cells* 25:6-21.
- 751 4. Miyata M. 2010. Unique centipede mechanism of *Mycoplasma* gliding. *Annu*  
752 *Rev Microbiol* 64:519-37.
- 753 5. Miyata M, Hamaguchi T. 2016. Prospects for the gliding mechanism of  
754 *Mycoplasma mobile*. *Curr Opin Microbiol* 29:15-21.
- 755 6. Miyata M, Hamaguchi T. 2016. Integrated information and prospects for  
756 gliding mechanism of the pathogenic bacterium *Mycoplasma pneumoniae*.  
757 *Front Microbiol* 7:960.
- 758 7. Uenoyama A, Kusumoto A, Miyata M. 2004. Identification of a 349-kilodalton  
759 protein (Gli349) responsible for cytoadherence and glass binding during  
760 gliding of *Mycoplasma mobile*. *J Bacteriol* 186:1537-45.
- 761 8. Seto S, Uenoyama A, Miyata M. 2005. Identification of a 521-kilodalton  
762 protein (Gli521) involved in force generation or force transmission for  
763 *Mycoplasma mobile* gliding. *J Bacteriol* 187:3502-10.
- 764 9. Uenoyama A, Miyata M. 2005. Identification of a 123-kilodalton protein  
765 (Gli123) involved in machinery for gliding motility of *Mycoplasma mobile*. *J*  
766 *Bacteriol* 187:5578-84.
- 767 10. Uenoyama A, Seto S, Nakane D, Miyata M. 2009. Regions on Gli349 and  
768 Gli521 protein molecules directly involved in movements of *Mycoplasma*  
769 *mobile* gliding machinery, suggested by use of inhibitory antibodies and  
770 mutants. *J Bacteriol* 191:1982-5.
- 771 11. Kusumoto A, Seto S, Jaffe JD, Miyata M. 2004. Cell surface differentiation of  
772 *Mycoplasma mobile* visualized by surface protein localization. *Microbiology*  
773 150:4001-8.
- 774 12. Miyata M, Petersen JD. 2004. Spike structure at the interface between  
775 gliding *Mycoplasma mobile* cells and glass surfaces visualized by

- 776 rapid-freeze-and-fracture electron microscopy. *J Bacteriol* 186:4382-6.
- 777 13. Adan-Kubo J, Uenoyama A, Arata T, Miyata M. 2006. Morphology of isolated  
778 Gli349, a leg protein responsible for *Mycoplasma mobile* gliding via glass  
779 binding, revealed by rotary shadowing electron microscopy. *J Bacteriol*  
780 188:2821-8.
- 781 14. Lesoil C, Nonaka T, Sekiguchi H, Osada T, Miyata M, Afrin R, Ikai A. 2010.  
782 Molecular shape and binding force of *Mycoplasma mobile*'s leg protein  
783 Gli349 revealed by an AFM study. *Biochem Biophys Res Commun*  
784 391:1312-7.
- 785 15. Metsugi S, Uenoyama A, Adan-Kubo J, Miyata M, Yura K, Kono H, Go N.  
786 2005. Sequence analysis of the gliding protein Gli349 in *Mycoplasma mobile*.  
787 *Biophysics (Nagoya-shi)* 1:33-43.
- 788 16. Hamaguchi T, Kawakami M, Furukawa H, Miyata M. 2019. Identification of  
789 novel protein domain for sialyloligosaccharide binding essential to  
790 *Mycoplasma mobile* gliding. *FEMS Microbiol Lett* 366:fnz016.
- 791 17. Morio H, Kasai T, Miyata M. 2016. Gliding direction of *Mycoplasma mobile*. *J*  
792 *Bacteriol* 198:283-90.
- 793 18. Kasai T, Hamaguchi T, Miyata M. 2015. Gliding motility of *Mycoplasma*  
794 *mobile* on uniform oligosaccharides. *J Bacteriol* 197:2952-7.
- 795 19. Kasai T, Nakane D, Ishida H, Ando H, Kiso M, Miyata M. 2013. Role of  
796 binding in *Mycoplasma mobile* and *Mycoplasma pneumoniae* gliding  
797 analyzed through inhibition by synthesized sialylated compounds. *J Bacteriol*  
798 195:429-35.
- 799 20. Nagai R, Miyata M. 2006. Gliding motility of *Mycoplasma mobile* can occur by  
800 repeated binding to *N*-acetylneuraminyllactose (sialyllactose) fixed on solid  
801 surfaces. *J Bacteriol* 188:6469-75.
- 802 21. Chen J, Neu J, Miyata M, Oster G. 2009. Motor-substrate interactions in  
803 *Mycoplasma* motility explains non-Arrhenius temperature dependence.  
804 *Biophys J* 97:2930-8.
- 805 22. Mizutani M, Tulum I, Kinoshita Y, Nishizaka T, Miyata M. 2018. Detailed  
806 analyses of stall force generation in *Mycoplasma mobile* gliding. *Biophys J*  
807 114:1411-1419.
- 808 23. Nishikawa M, Nakane D, Toyonaga T, Kawamoto A, Kato T, Namba K, Miyata

- 809 M. 2019. Refined mechanism of *Mycoplasma mobile* gliding based on  
810 structure, ATPase activity, and sialic acid binding of machinery. mBio  
811 10:e02846-19.
- 812 24. Nakane D, Miyata M. 2007. Cytoskeletal "jellyfish" structure of *Mycoplasma*  
813 *mobile*. Proc Natl Acad Sci U S A 104:19518-23.
- 814 25. Tulum I, Yabe M, Uenoyama A, Miyata M. 2014. Localization of P42 and  
815 F<sub>1</sub>-ATPase alpha-subunit homolog of the gliding machinery in *Mycoplasma*  
816 *mobile* revealed by newly developed gene manipulation and fluorescent  
817 protein tagging. J Bacteriol 196:1815-24.
- 818 26. Tulum I, Kimura K, Miyata M. 2020. Identification and sequence analyses of  
819 the gliding machinery proteins from *Mycoplasma mobile*. Sci Rep 10:3792.
- 820 27. Walker JE, Saraste M, Runswick MJ, Gay NJ. 1982. Distantly related  
821 sequences in the alpha- and beta-subunits of ATP synthase, myosin, kinases  
822 and other ATP-requiring enzymes and a common nucleotide binding fold.  
823 Embo j 1:945-51.
- 824 28. Abrahams JP, Leslie AG, Lutter R, Walker JE. 1994. Structure at 2.8 Å  
825 resolution of F<sub>1</sub>-ATPase from bovine heart mitochondria. Nature 370:621-8.
- 826 29. Kühlbrandt W. 2019. Structure and Mechanisms of F-Type ATP Synthases.  
827 Annu Rev Biochem 88:515-549.
- 828 30. Beven L, Charenton C, Dautant A, Bouyssou G, Labroussaa F, Skollermo A,  
829 Persson A, Blanchard A, Sirand-Pugnet P. 2012. Specific evolution of F<sub>1</sub>-like  
830 ATPases in mycoplasmas. PLoS One 7:e38793.
- 831 31. Nottelet P, Bataille L, Gourgues G, Anger R, Lartigue C, Sirand-Pugnet P,  
832 Marza E, Fronzes R, Arfi Y. 2021. The mycoplasma surface proteins MIB and  
833 MIP promote the dissociation of the antibody-antigen interaction. Sci Adv 7.
- 834 32. Kobayashi K, Kodera N, Kasai T, Tahara YO, Toyonaga T, Mizutani M,  
835 Fujiwara I, Ando T, Miyata M. 2021. Movements of *Mycoplasma mobile*  
836 gliding machinery detected by high-speed atomic force microscopy. bioRxiv  
837 doi:10.1101/2021.01.28.428740:2021.01.28.428740.
- 838 33. Bowler MW, Montgomery MG, Leslie AG, Walker JE. 2006. How azide  
839 inhibits ATP hydrolysis by the F-ATPases. Proc Natl Acad Sci U S A  
840 103:8646-9.
- 841 34. Zivanov J, Nakane T, Forsberg BO, Kimanius D, Hagen WJ, Lindahl E,

- 842 Scheres SH. 2018. New tools for automated high-resolution cryo-EM  
843 structure determination in RELION-3. *eLife* 7:e42166.
- 844 35. Ando T. 2018. High-speed atomic force microscopy and its future prospects.  
845 *Biophys Rev* 10:285-292.
- 846 36. Uchihashi T, Iino R, Ando T, Noji H. 2011. High-speed atomic force  
847 microscopy reveals rotary catalysis of rotorless F<sub>1</sub>-ATPase. *Science*  
848 333:755-8.
- 849 37. Guo H, Suzuki T, Rubinstein JL. 2019. Structure of a bacterial ATP synthase.  
850 *eLife* 8:e43128.
- 851 38. Cheng Y, Wolf E, Larvie M, Zak O, Aisen P, Grigorieff N, Harrison SC, Walz T.  
852 2006. Single particle reconstructions of the transferrin-transferrin receptor  
853 complex obtained with different specimen preparation techniques. *J Mol Biol*  
854 355:1048-65.
- 855 39. Dibrova DV, Konovalov KA, Perekhvatov VV, Skulachev KV, Mulikidjanian AY.  
856 2017. COGcollator: a web server for analysis of distant relationships  
857 between homologous protein families. *Biol Direct* 12:29.
- 858 40. Neuwald AF, Aravind L, Spouge JL, Koonin EV. 1999. AAA+: A class of  
859 chaperone-like ATPases associated with the assembly, operation, and  
860 disassembly of protein complexes. *Genome Res* 9:27-43.
- 861 41. Snider J, Thibault G, Houry WA. 2008. The AAA+ superfamily of functionally  
862 diverse proteins. *Genome Biol* 9:216.
- 863 42. Minauro-Sanmiguel F, Wilkens S, García JJ. 2005. Structure of dimeric  
864 mitochondrial ATP synthase: novel F<sub>0</sub> bridging features and the structural  
865 basis of mitochondrial cristae biogenesis. *Proc Natl Acad Sci U S A*  
866 102:12356-8.
- 867 43. Allegretti M, Klusch N, Mills DJ, Vonck J, Kühlbrandt W, Davies KM. 2015.  
868 Horizontal membrane-intrinsic  $\alpha$ -helices in the stator a-subunit of an F-type  
869 ATP synthase. *Nature* 521:237-40.
- 870 44. Blum TB, Hahn A, Meier T, Davies KM, Kühlbrandt W. 2019. Dimers of  
871 mitochondrial ATP synthase induce membrane curvature and self-assemble  
872 into rows. *Proc Natl Acad Sci U S A* 116:4250-4255.
- 873 45. Tanaka A, Nakane D, Mizutani M, Nishizaka T, Miyata M. 2016. Directed  
874 binding of gliding bacterium, *Mycoplasma mobile*, shown by detachment

- 875 force and bond lifetime. *mBio* 7:00455-16.
- 876 46. Noji H, Ueno H, McMillan DGG. 2017. Catalytic robustness and torque  
877 generation of the F<sub>1</sub>-ATPase. *Biophys Rev* 9:103-118.
- 878 47. Naito TM, Masaike T, Nakane D, Sugawa M, Okada KA, Nishizaka T. 2019.  
879 Single-molecule pull-out manipulation of the shaft of the rotary motor  
880 F<sub>1</sub>-ATPase. *Sci Rep* 9:7451.
- 881 48. Watson HC, Walker NP, Shaw PJ, Bryant TN, Wendell PL, Fothergill LA,  
882 Perkins RE, Conroy SC, Dobson MJ, Tuite MF. 1982. Sequence and  
883 structure of yeast phosphoglycerate kinase. *Embo j* 1:1635-40.
- 884 49. Jaffe JD, Stange-Thomann N, Smith C, DeCaprio D, Fisher S, Butler J, Calvo  
885 S, Elkins T, FitzGerald MG, Hafez N, Kodira CD, Major J, Wang S, Wilkinson  
886 J, Nicol R, Nusbaum C, Birren B, Berg HC, Church GM. 2004. The complete  
887 genome and proteome of *Mycoplasma mobile*. *Genome Res* 14:1447-61.
- 888 50. Lu M, Holliday LS, Zhang L, Dunn WA, Jr., Gluck SL. 2001. Interaction  
889 between aldolase and vacuolar H<sup>+</sup>-ATPase: evidence for direct coupling of  
890 glycolysis to the ATP-hydrolyzing proton pump. *J Biol Chem* 276:30407-13.
- 891 51. Lu M, Ammar D, Ives H, Albrecht F, Gluck SL. 2007. Physical interaction  
892 between aldolase and vacuolar H<sup>+</sup>-ATPase is essential for the assembly and  
893 activity of the proton pump. *J Biol Chem* 282:24495-503.
- 894 52. Chan CY, Dominguez D, Parra KJ. 2016. Regulation of Vacuolar H<sup>+</sup>-ATPase  
895 (V-ATPase) Reassembly by Glycolysis Flow in 6-Phosphofructo-1-kinase  
896 (PFK-1)-deficient Yeast Cells. *J Biol Chem* 291:15820-9.
- 897 53. Kinoshita Y, Nakane D, Sugawa M, Masaike T, Mizutani K, Miyata M,  
898 Nishizaka T. 2014. Unitary step of gliding machinery in *Mycoplasma mobile*.  
899 *Proc Natl Acad Sci U S A* 111:8601-6.
- 900 54. Kinoshita Y, Miyata M, Nishizaka T. 2018. Linear motor driven-rotary motion of  
901 a membrane-permeabilized ghost in *Mycoplasma mobile*. *Sci Rep* 8:11513.
- 902 55. Uenoyama A, Miyata M. 2005. Gliding ghosts of *Mycoplasma mobile*. *Proc*  
903 *Natl Acad Sci USA* 102:12754-8.
- 904 56. Miyata M, Yamamoto H, Shimizu T, Uenoyama A, Citti C, Rosengarten R.  
905 2000. Gliding mutants of *Mycoplasma mobile*: relationships between motility  
906 and cell morphology, cell adhesion and microcolony formation. *Microbiology*  
907 146:1311-20.



- 908 57. Aluotto BB, Wittler RG, Williams CO, Faber JE. 1970. Standardized  
909 bacteriologic techniques for the characterization of *Mycoplasma* species. Int  
910 J Syst Bacteriol 20:35-58.
- 911 58. Kawakita Y, Kinoshita M, Furukawa Y, Tulum I, Tahara YO, Katayama E,  
912 Namba K, Miyata M. 2016. Structural study of MPN387, an essential protein  
913 for gliding motility of a human-pathogenic bacterium, *Mycoplasma*  
914 *pneumoniae*. J Bacteriol 198:2352-9.
- 915 59. Lee C, Levin A, Branton D. 1987. Copper staining: a five-minute protein stain  
916 for sodium dodecyl sulfate-polyacrylamide gels. Anal Biochem 166:308-12.
- 917 60. Dzandu JK, Johnson JF, Wise GE. 1988. Sodium dodecyl sulfate-gel  
918 electrophoresis: staining of polypeptides using heavy metal salts. Anal  
919 Biochem 174:157-67.
- 920 61. Zerbetto E, Vergani L, Dabbeni-Sala F. 1997. Quantification of muscle  
921 mitochondrial oxidative phosphorylation enzymes via histochemical staining  
922 of blue native polyacrylamide gels. Electrophoresis 18:2059-64.
- 923 62. Wittig I, Schägger H. 2005. Advantages and limitations of clear-native PAGE.  
924 Proteomics 5:4338-46.
- 925 63. Webb MR. 1992. A continuous spectrophotometric assay for inorganic  
926 phosphate and for measuring phosphate release kinetics in biological  
927 systems. Proc Natl Acad Sci U S A 89:4884-7.
- 928 64. Zhang K. 2016. Gctf: Real-time CTF determination and correction. J Struct  
929 Biol 193:1-12.
- 930 65. Pettersen EF, Goddard TD, Huang CC, Couch GS, Greenblatt DM, Meng EC,  
931 Ferrin TE. 2004. UCSF Chimera--a visualization system for exploratory  
932 research and analysis. J Comput Chem 25:1605-12.
- 933 66. Ando T, Kodera N, Takai E, Maruyama D, Saito K, Toda A. 2001. A  
934 high-speed atomic force microscope for studying biological macromolecules.  
935 Proc Natl Acad Sci U S A 98:12468-72.
- 936 67. Uchihashi T, Kodera N, Ando T. 2012. Guide to video recording of structure  
937 dynamics and dynamic processes of proteins by high-speed atomic force  
938 microscopy. Nat Protoc 7:1193-206.
- 939 68. Ngo KX, Kodera N, Katayama E, Ando T, Uyeda TQ. 2015. Cofilin-induced  
940 unidirectional cooperative conformational changes in actin filaments revealed

941 by high-speed atomic force microscopy. eLife 4:e04806.  
942

# Figure 1

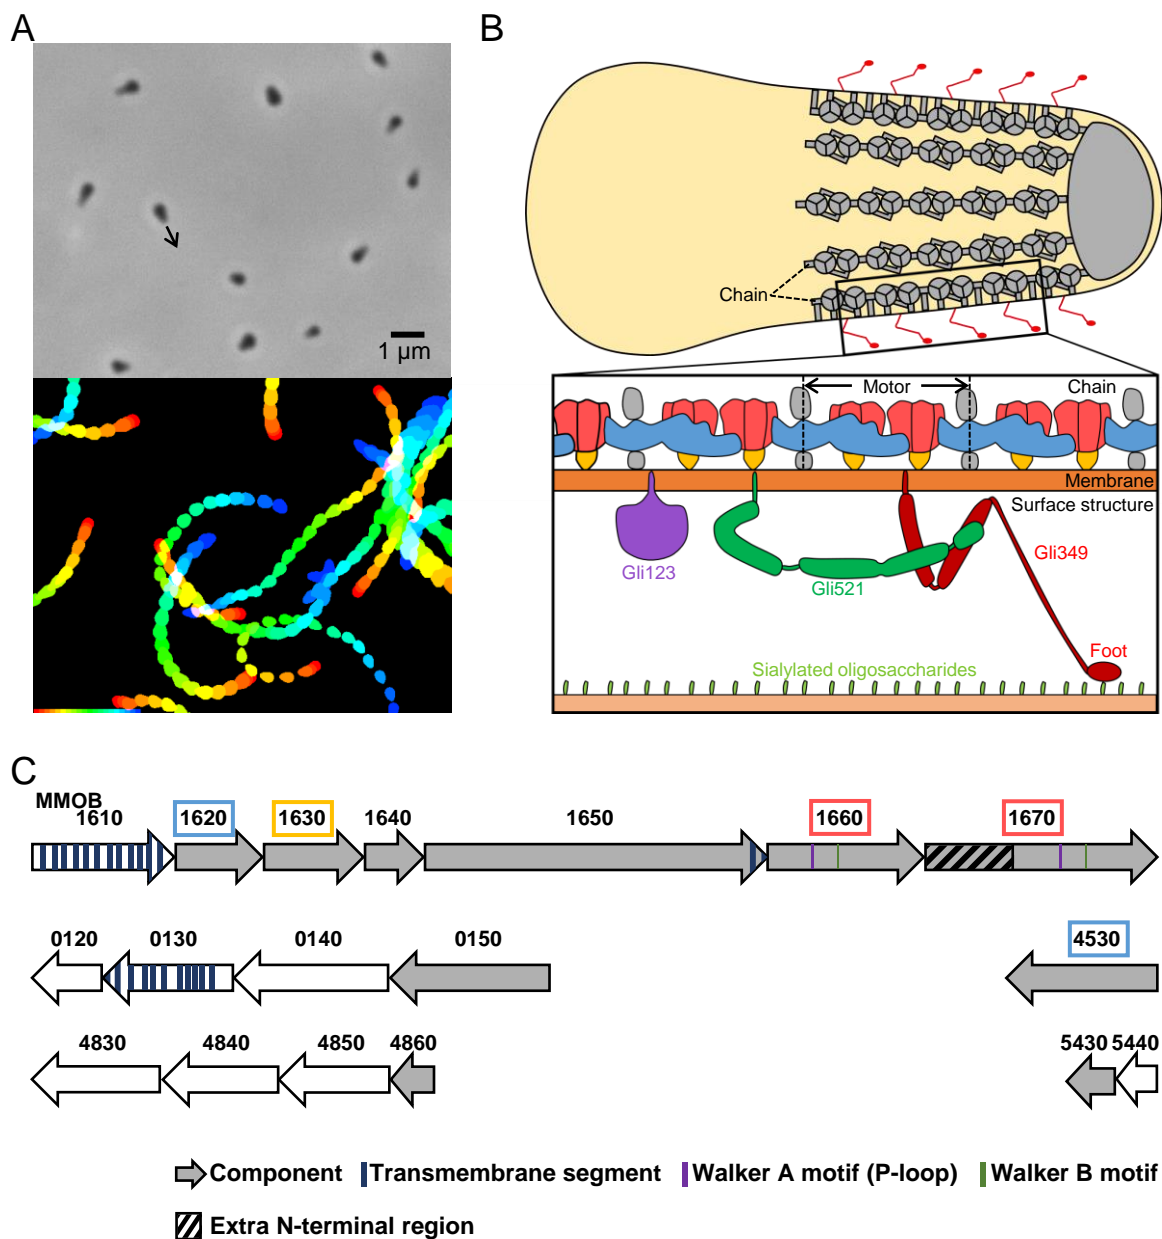

**FIG 1. Gliding machinery of *Mycoplasma mobile*.** (A) Optical microscopy of cells (upper) and trajectories of gliding cells (lower). The gliding direction is indicated by a black arrow. The 4-second trajectory is colored from red to blue. (B) Schematic illustration of gliding machinery based on the present study. In the whole cell shown in upper illustration, the internal structure and legs are colored gray and red, respectively. The actual cell has about 28 chains, each consisting of 17 particles, although a more limited number is illustrated here. A single unit of the surface structure and a chain of the internal structure are magnified in the lower illustration. “Motor” is identical to “chain particle.” (C) ORFs for the internal structure. The components of the internal structure are colored gray. Type 2 ATPase operon is at the top. Motor components revealed in the present study are marked by colored boxes, corresponding to the colored components of the lower illustration in panel B.

## Figure 2

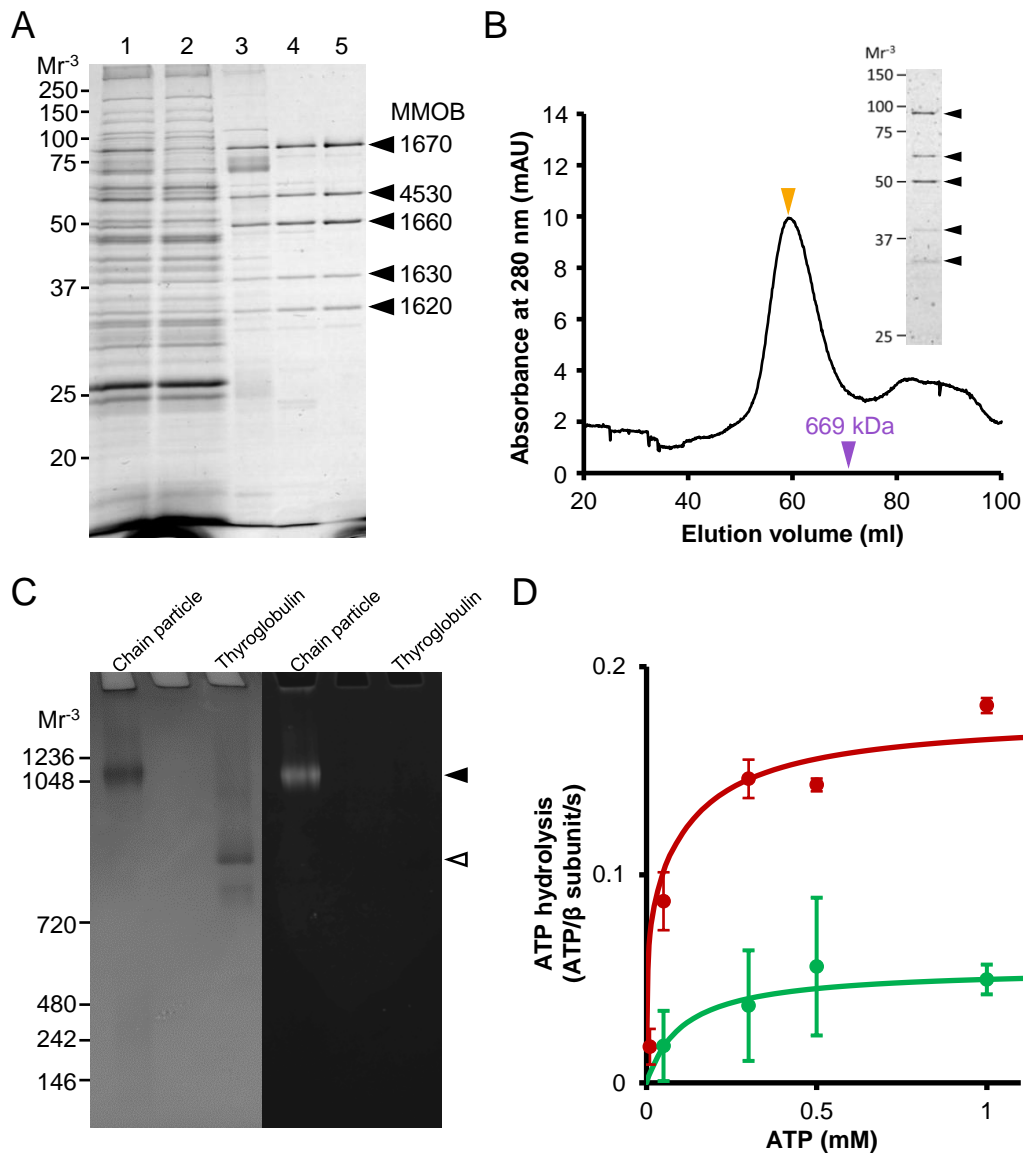

**FIG 2. Isolation profile and characterization of chain particle.** (A) Protein profile of each fraction. The fractions were subjected to SDS-12.5% PAGE gel and stained with CBB. Lane 1, lysate of *M. mobile* cells; lane 2, Triton-soluble fraction; lane 3, Triton-insoluble fraction; lane 4, supernatant after incubation in a buffer containing 137 mM NaCl; lane 5, peak fraction of Superdex 200 gel filtration chromatography. The bands of the chain particle components are marked by black triangles. Molecular masses are shown on the left. (B) Gel filtration assay using Sephacryl S-400 HR column. The peak position of thyroglobulin (669 kDa) is marked by a purple triangle. The peak fraction of the chain particles marked by an orange triangle was analyzed by SDS-12.5% PAGE. The bands of the chain particle components are marked by black triangles. (C) BN-PAGE (left) and In-gel ATPase activity assay (right). Isolated chain particle and thyroglobulin, which has no ATPase activity, were subjected to 3 to 12% gradient BN-PAGE. The band positions of the chain particle and thyroglobulin are marked by black and open triangles, respectively. White precipitates, indicating ATPase activity, appeared only at the band position of the chain particle. Molecular masses are shown on the left. (D) Phosphate release assay under various ATP concentrations with and without sodium azide. The ATPase activities under 0- and 15.4-mM sodium azide are marked by red and green filled circles, respectively ( $n = 3$ ). These data were fitted by the Michaelis-Menten equation as solid lines.

# Figure 3

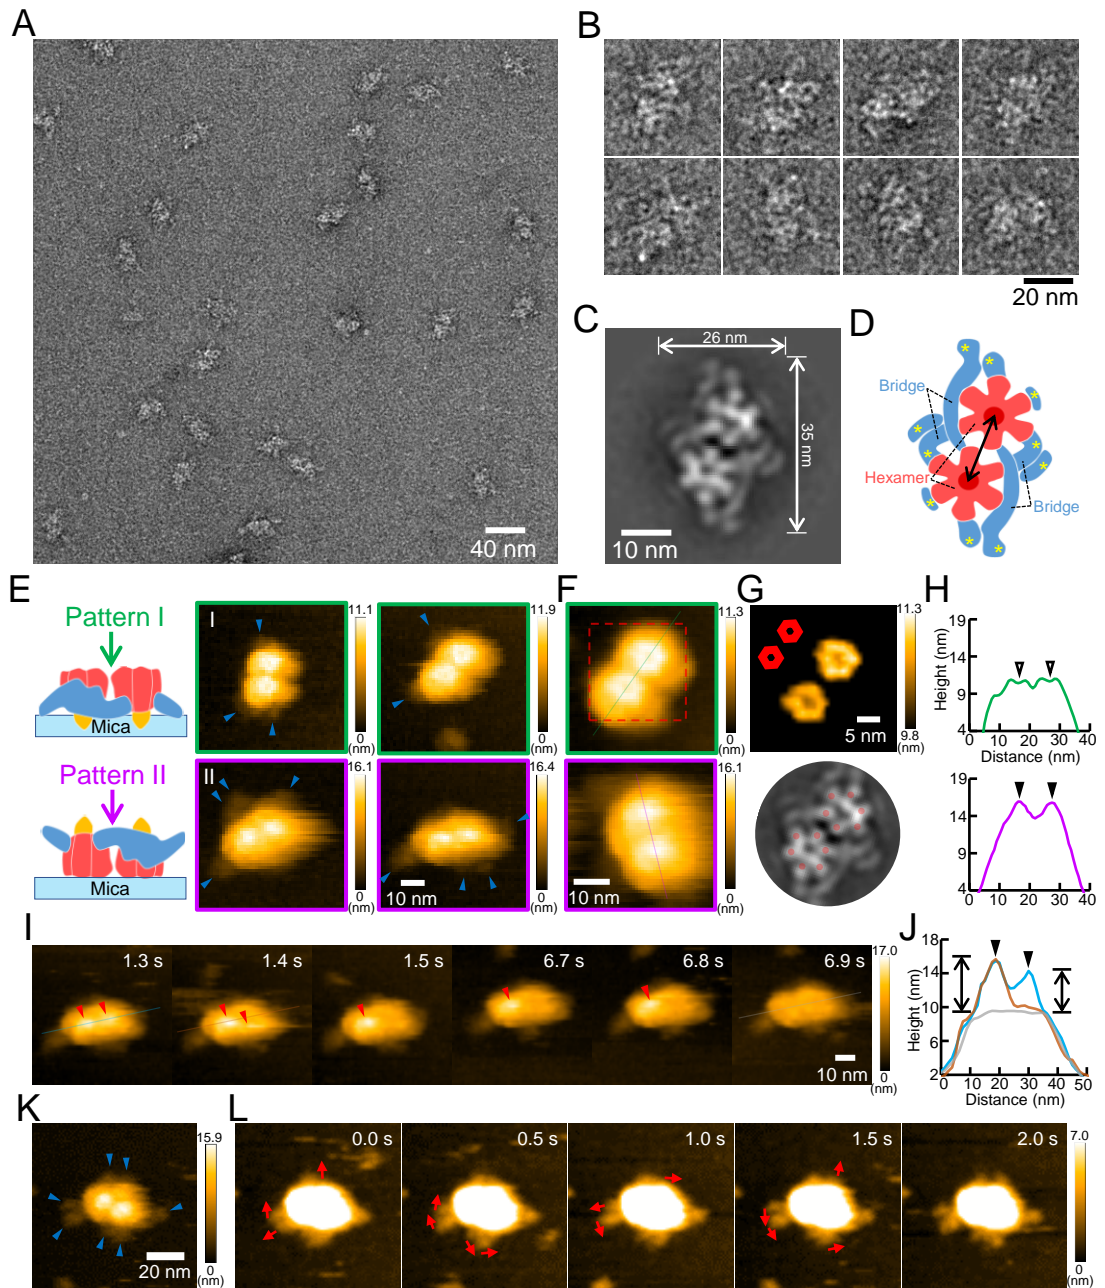

**FIG 3. Negative-staining EM and HS-AFM of chain particle (motor). (A)**

Electron micrograph of negatively stained chain particles. (B) Images of individual particles. (C) Representative 2D averaged image. A mirror image is shown to match the orientation of the hexameric ring observed by HS-AFM. (D) Illustration based on the averaged image in panel C. Filamentous structures are marked by asterisks at an end. The double-headed arrow shows the distance between the centers of the hexamers. (E) Two patterns of HS-AFM images. The motor (chain particle) was scanned at  $56 \times 56$  pixels in an area of  $70 \times 70 \text{ nm}^2$  with a scanning rate of 100 ms per frame. Illustrations for patterns I and II (left side) were depicted based on 3D chain model shown in Fig. 5. Observation directions are indicated by arrows. Protrusions are marked by blue triangles. Images of patterns I and II are shown in green and purple frames, respectively. (F) Averaged images for patterns I (green frame) and II (purple frame). The motor was scanned at  $50 \times 50$  pixels in an area of  $40 \times 40 \text{ nm}^2$  with a scanning rate of 100 ms per frame. The images were produced by averaging three successive video frames. (G) HS-AFM slice image showing two hexameric rings (upper) and averaged EM image (lower). Upper: The red broken boxed area in panel F was sliced for the height 9.8–11.3 nm from the substrate surface, processed for smoothing, and magnified. The angle alignments of two hexamers are schematically shown in the left upper. Lower: The central part of panel C was excised and aligned to compare with the upper panel. Subunits of the hexamer are marked by red circles. (H) Surface profiles along the lines in pattern I (green) and II (purple). The upper and lower images in panel F were each profiled at the green and purple lines passing the globule centers. The dimples and the peaks are marked by open and black triangles, respectively. (I) Shedding process of the peaks of pattern II particle shown in panel E. The peaks are marked by red triangles. (J) Surface profile showing the disappeared peaks. The images in panel I were each profiled at the clear blue, brown, and gray lines passing the globule centers. The peaks are marked by black triangles. The double-headed arrows show the peak heights. (K) HS-AFM image of the motor with seven lateral protrusions. The motor was scanned at  $120 \times 120$  pixels in an area of  $120 \times 120 \text{ nm}^2$  with a scanning rate of 500 ms per frame. Lateral protrusions are indicated by blue triangles. (L) Fluctuations of the protrusions of the particle shown in panel K. The images were sliced for the height 0–7.0 nm from the substrate surface. The moving directions are indicated by arrows. In all HS-AFM images, the color bar on the right shows the range of image heights.

# Figure 4

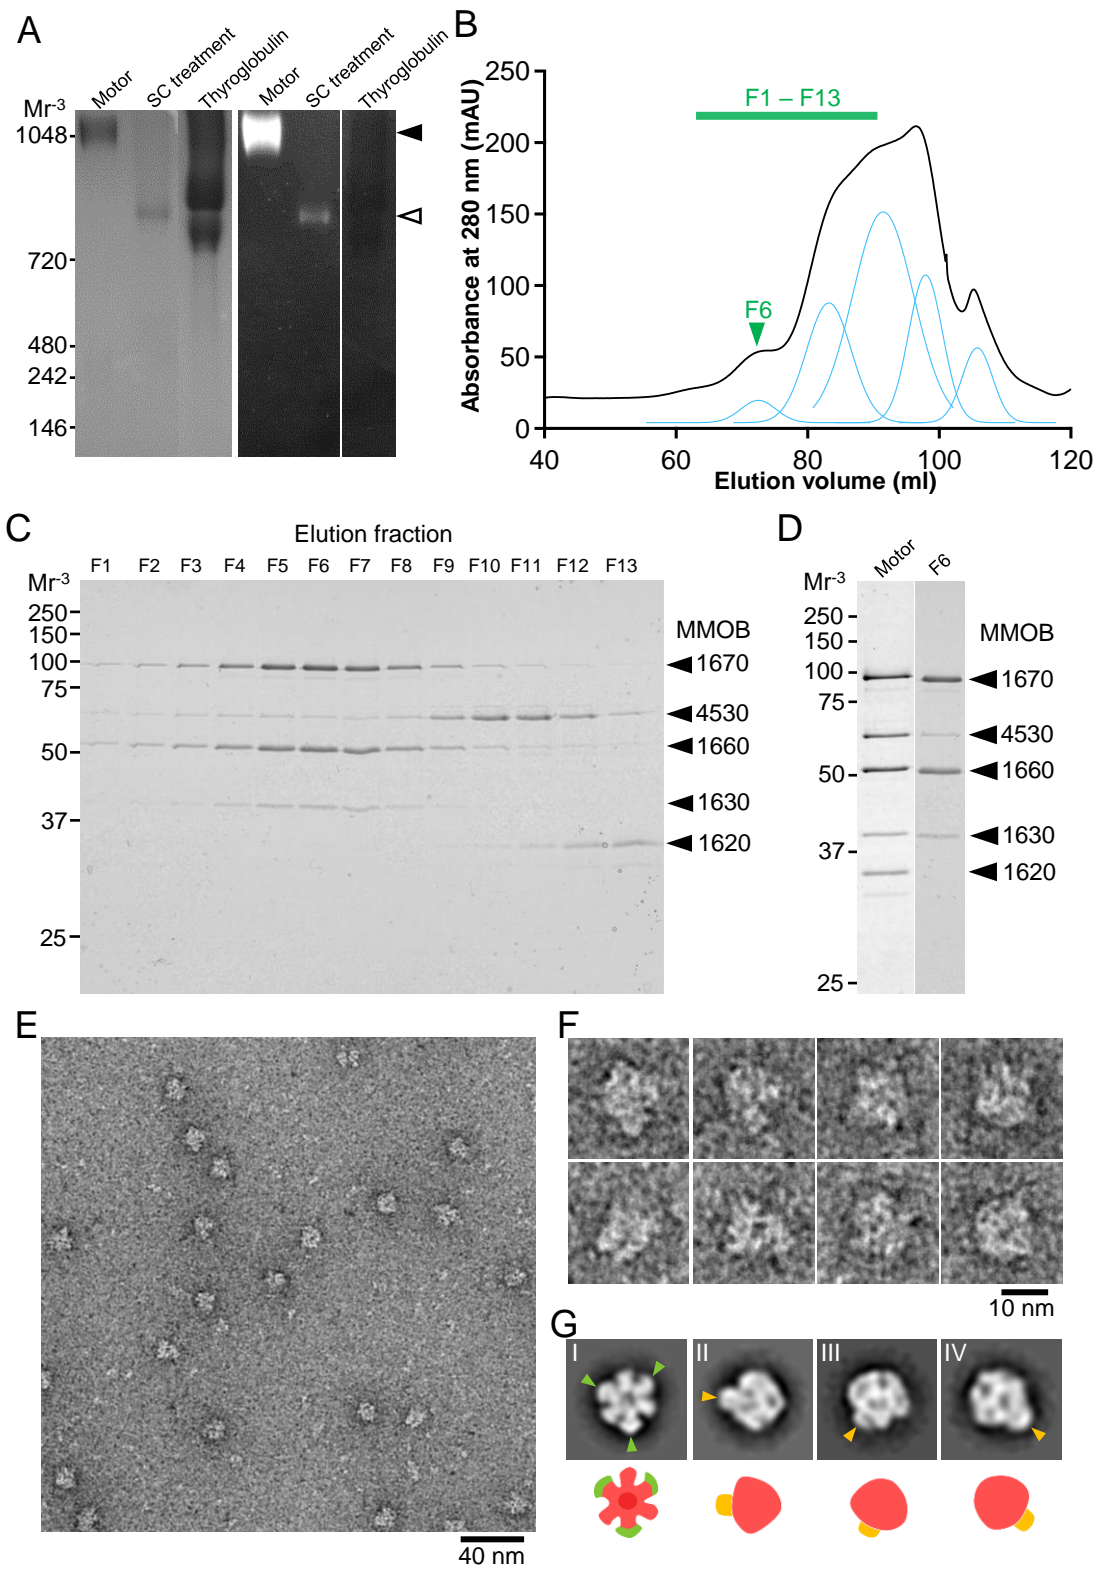

**FIG 4. Isolation of F<sub>1</sub>-like ATPase unit.** (A) BN-PAGE of motors (chain particles) treated with 1.5% sodium cholate (left) and In-gel ATPase activity assay (right). Motors, motors treated with 1.5% sodium cholate (SC treatment), and thyroglobulin were subjected to 3 to 12% gradient BN-PAGE. The band of the motor is marked by a black triangle. The band of the ATPase unit revealed by sodium cholate treatment is indicated by an open triangle. The white lead phosphate bands indicate ATPase activity. Molecular masses are shown on the left. (B) Gel filtration assay using a Sephacryl S-400 HR column. The light blue lines show a Gaussian fit. (C) The F1–F13 fractions in the gel filtration assay indicated by the green line in panel B were subjected to SDS-12.5% PAGE and stained with CBB. Bands for motor components are marked by black triangles. (D) Comparison of band patterns between F6 and the motor on CBB-stained SDS-12.5% PAGE. The position of F6 in the elution volume is marked by a green triangle in panel B. (E) Electron micrograph of negatively stained ATPase in F6. (F) Images of individual particles. (G) Representative 2D averaged images (upper) and depictions of their structures (lower). Upper: Hook structures in the hexameric ring and the stalks are marked by green and orange triangles, respectively. Lower: The hexameric part, hook structures and the stalk are colored rose, green and orange, respectively.



# Figure 5

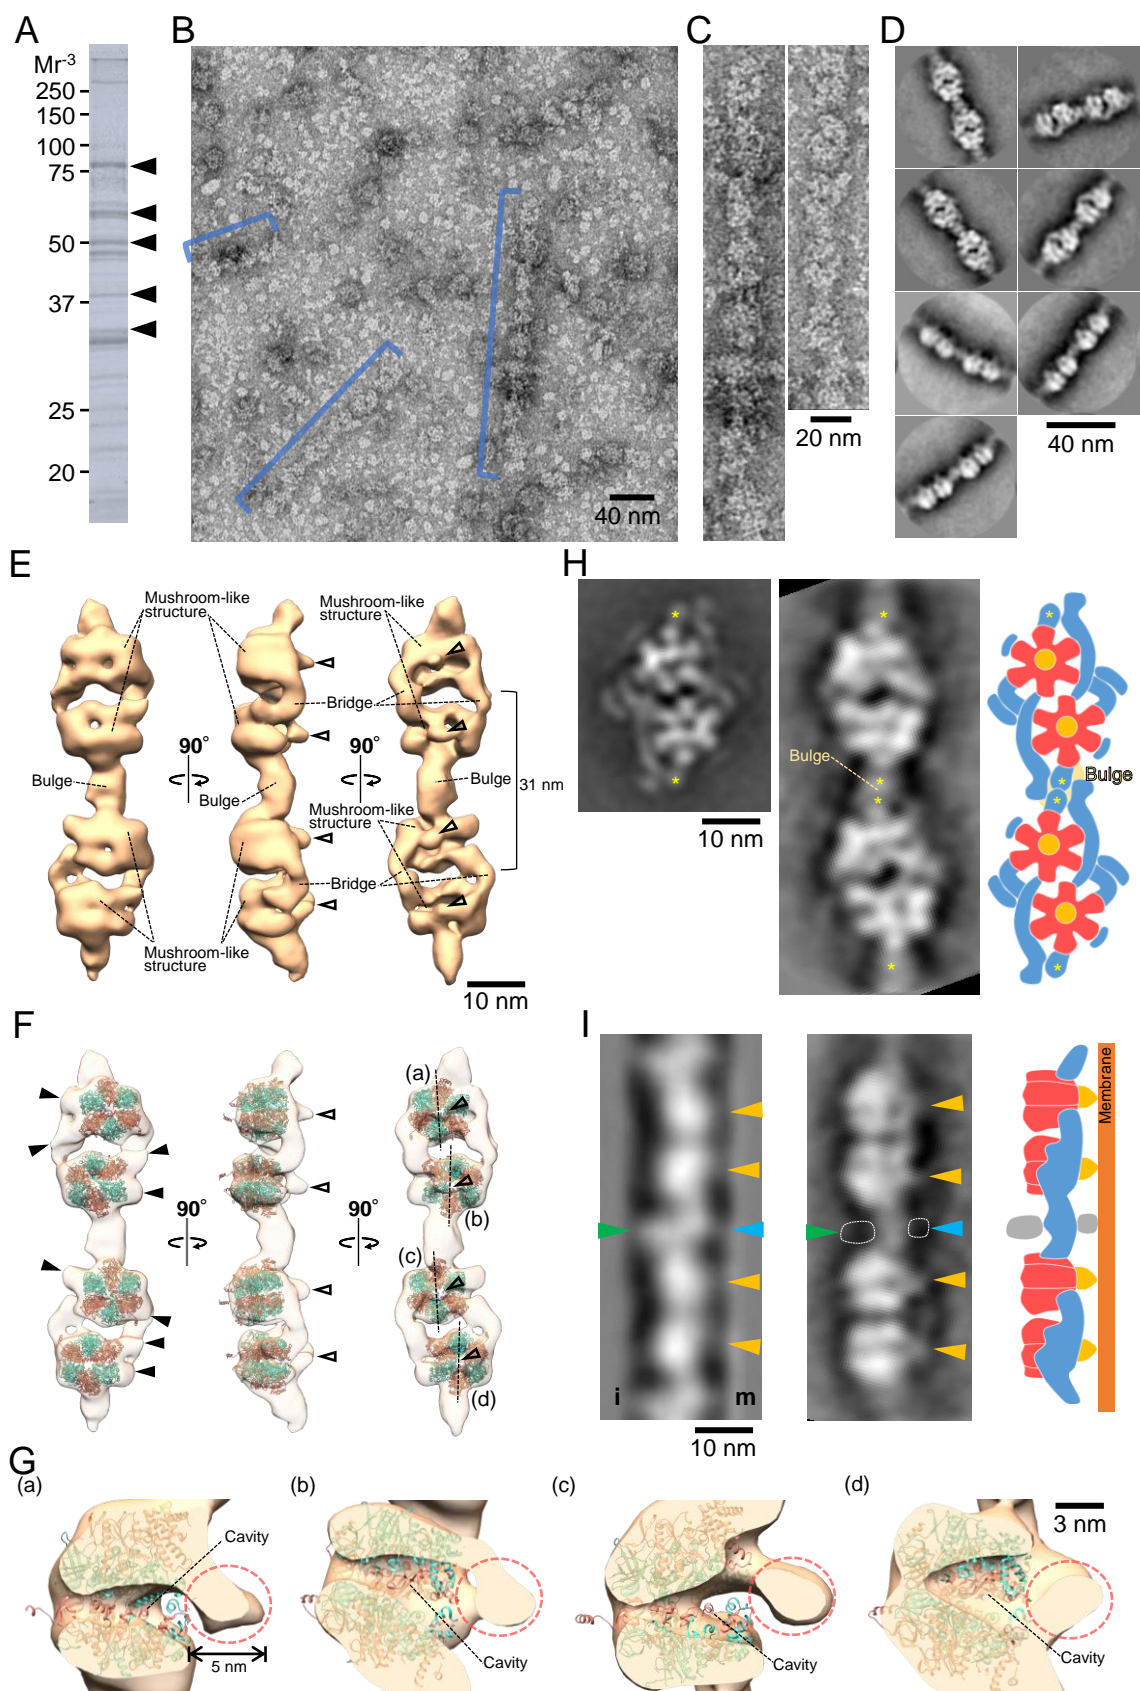

**FIG 5. Motor chain structure.** (A) Protein profile of chain fraction. CBB-stained SDS-12.5% PAGE image of the crude chain fraction. The bands of motor components, MMOBs 1670, 4530, 1660, 1630, and 1620 are marked by black triangles from upper to lower. (B) Electron micrograph of negatively stained chains. The chain structures are marked by blue lines. (C) Magnified chain images. (D) Representative 2D averaged images. (E) Three-dimensional reconstruction of chain containing two  $F_1$ -like ATPase dimers. The 3D map is visualized at a density threshold (contour level = 0.026). The central stalks are marked by open triangles. (F) Superposition of the atomic model of *Bacillus*  $F_1$ -ATPase catalytic  $(\alpha\beta)_3$  (PDB ID 6N2Y) (37) onto the 3D chain structure. The  $\alpha$  and  $\beta$  subunits are colored salmon and turquoise, respectively. The central stalk and protrusions from hexameric rings are marked by open and black triangles, respectively. (G) Cross section of mushroom-like structures. Central stalks are marked by broken circles. The double-headed arrow shows the length of the protrusion. Corresponding mushroom-like structures are marked (a)–(d) in panel F. (H) Comparison between the motor image from Fig. 3C (left) and the chain reprojection (middle). The reprojected image is viewed from the angle used for the right image of panel E. Short filaments corresponding to the position of the connecting bulge are marked by asterisks. A depiction of the chain model based on the comparison (right). (I) Comparison between the averaged chain image from ECT (left) and the chain reprojection (middle). Left image was modified from (23). The chain was reprojected from an angle close to the middle image in panel E. Inner sides and membrane relative to the chain are marked by i and m, respectively. The protrusion from the globule corresponding to the central stalk from the hexameric ring, one from the connecting bulge and the globule attached to the connecting bulge are marked by orange, light blue and green triangles, respectively. The areas of image densities that were visualized only in the ECT image are marked by broken lines. An illustration depicts a chain model based on the comparison (right).

## Figure 6

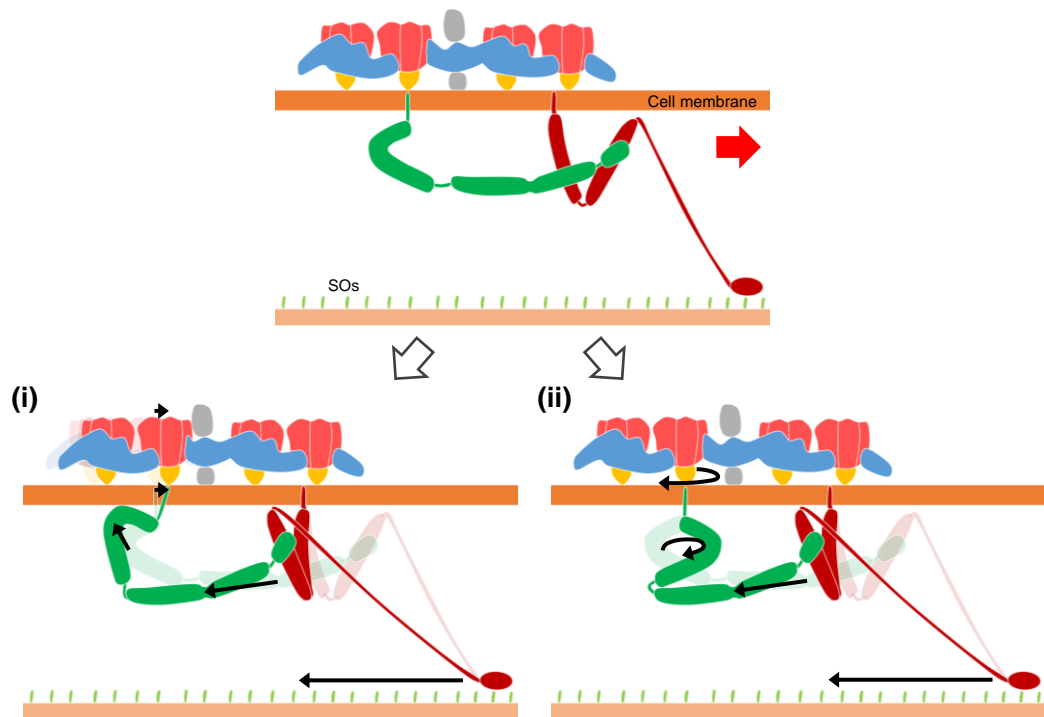

**FIG 6. Working models for force transmission mechanism.** The gliding direction is indicated by a red arrow. The regions marked in gray were visualized only in the ECT image. The crank protein Gli521 and the leg protein Gli349 are colored green and red, respectively. (i) Contraction model: The force generated by the hexameric ring displaces the motor along the gliding direction. The displacements are transmitted through the membrane to Gli521. (ii) Rotation model: The force generated by the hexameric ring rotates the central stalk in a mechanism similar to that of  $F_1$ -ATPase. The rotational motion is transmitted across the membrane to Gli521. The generation and transmission of forces are presented by black arrows for both models.

## Supplementary figure 1

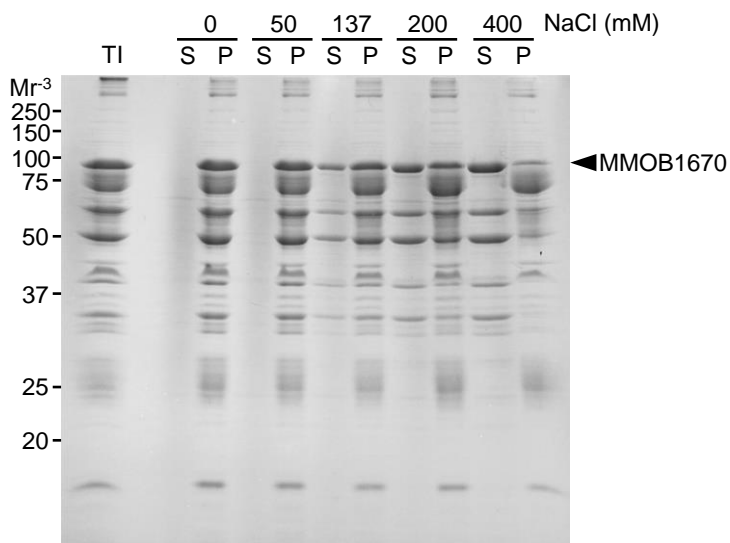

**FIG S1 Conditions to solubilize chain particle.** The Triton-insoluble fraction was treated with buffers containing the specified concentrations of NaCl and centrifuged. The Triton-insoluble fraction (TI), the supernatants (S) and the pellets (P) were analyzed by SDS-12.5% PAGE. MMOB1670, a component of the chain, is marked by a black triangle. Molecular masses are shown on the left.

## Supplementary figure 2

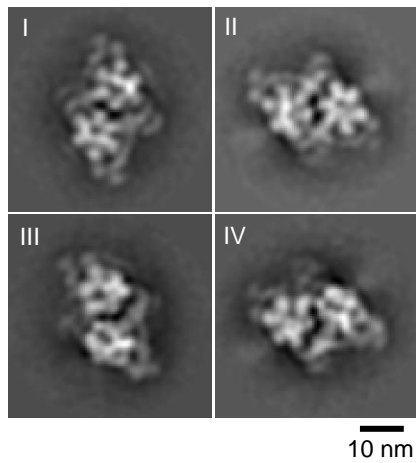

**FIG S2 Two-dimensional averaged images of chain particle obtained by negative-staining EM.** Four classes of clear particle images from 20 classes are represented. As mentioned in Fig. 3C, they were mirrored.

## Supplementary figure 3

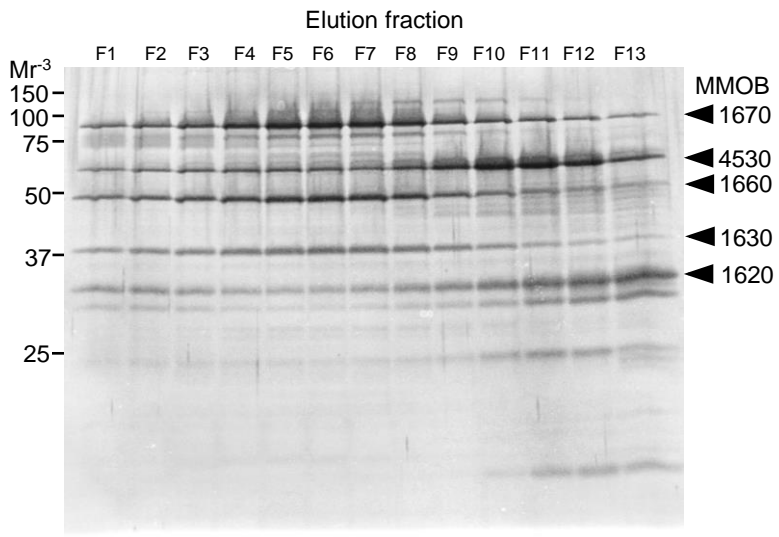

**FIG S3 Protein profiles of gel-filtration fractions visualized by reverse-staining method.** Motor components are marked by black triangles on the right. Molecular masses are shown on the left. Fractions F10–F13 correspond to the first half of the large three peaks in the elution volume from 80–100 mL shown in Fig. 4B.

## Supplementary figure 4

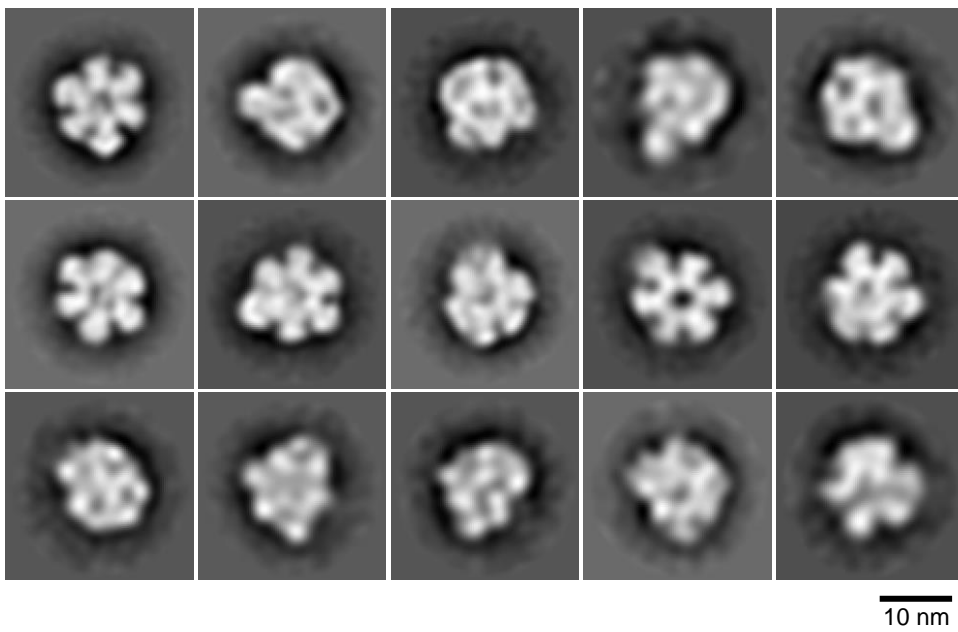

**FIG S4 Two-dimensional averaged images of globular complex in F6.**  
Fifteen classes of clear particle images from 50 classes are represented.

## Supplementary figure 5

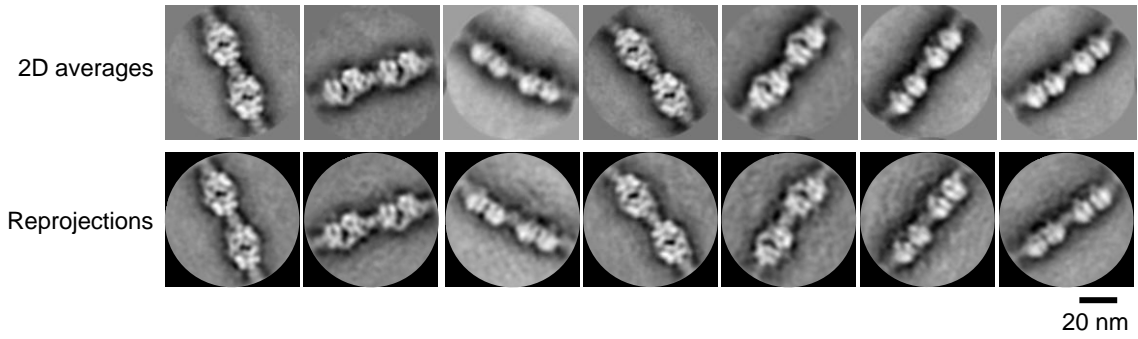

**FIG S5 Reprojection images of chain.** Two-dimensional averaged images (upper) and the corresponding reprojection images (lower) calculated from the 3D map of the chain are compared.



## Movie S1

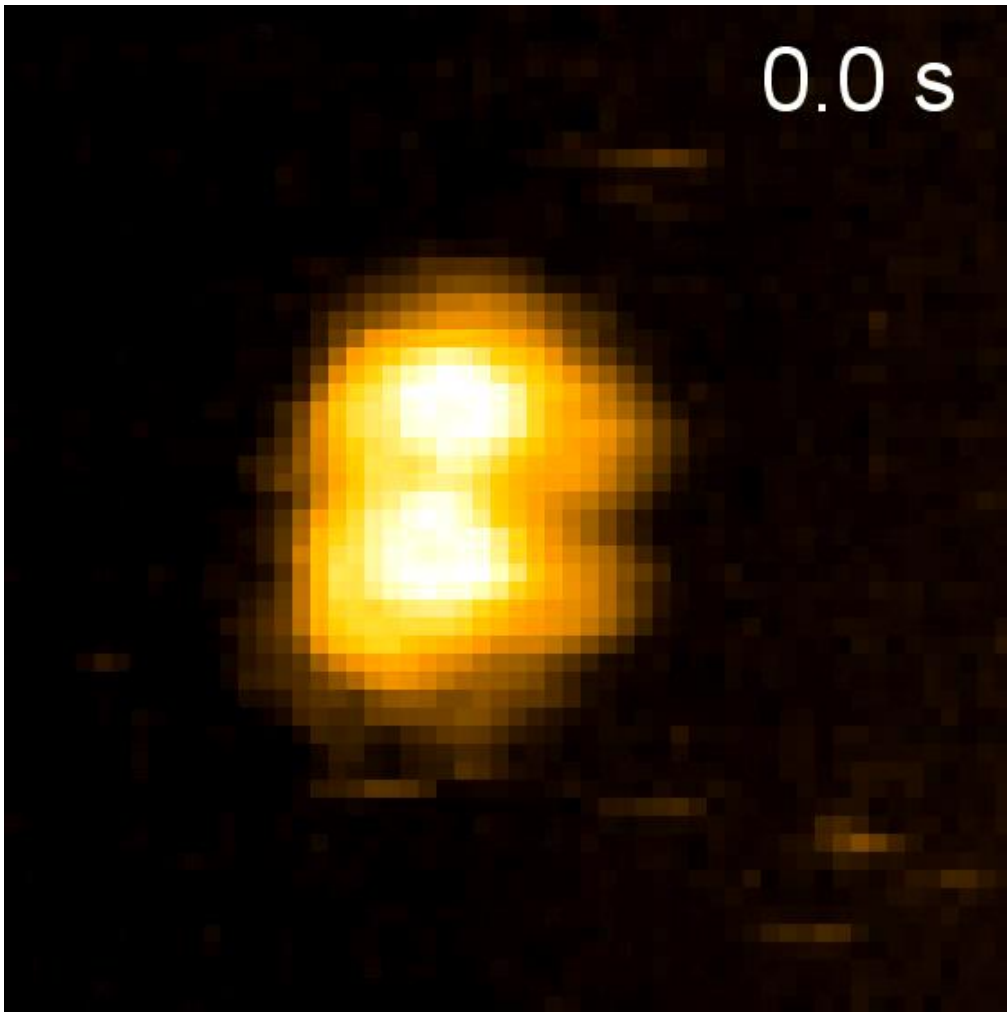

**Movie S1 HS-AFM movie showing pattern I particles** The particles were scanned at 10 fps. The scanning field was  $70 \times 70 \text{ nm}^2$  with  $56 \times 56$  pixels. The video was played at 10 fps.

## Movie S2

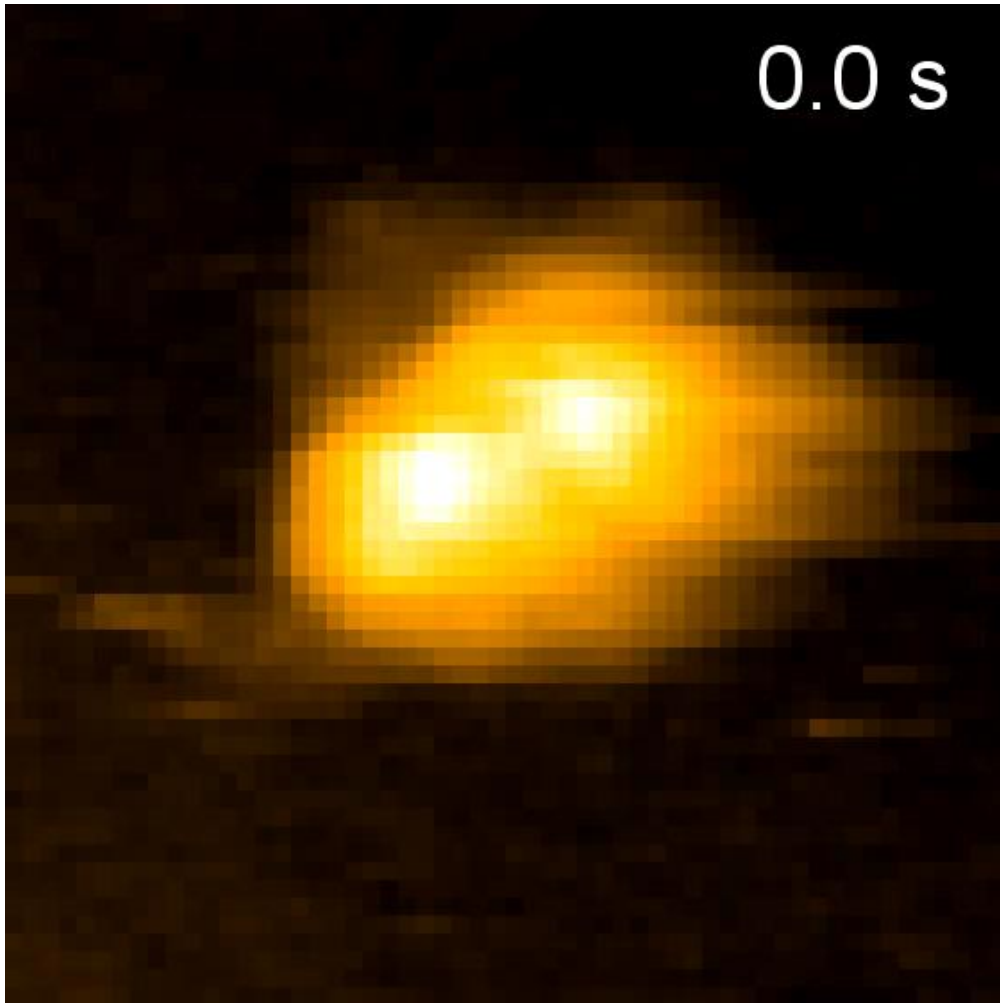

**Movie S2 HS-AFM movie showing pattern II particles** The particles were scanned at 10 fps. The scanning field was  $70 \times 70 \text{ nm}^2$  with  $56 \times 56$  pixels. The video was played at 10 fps.

## Movie S3

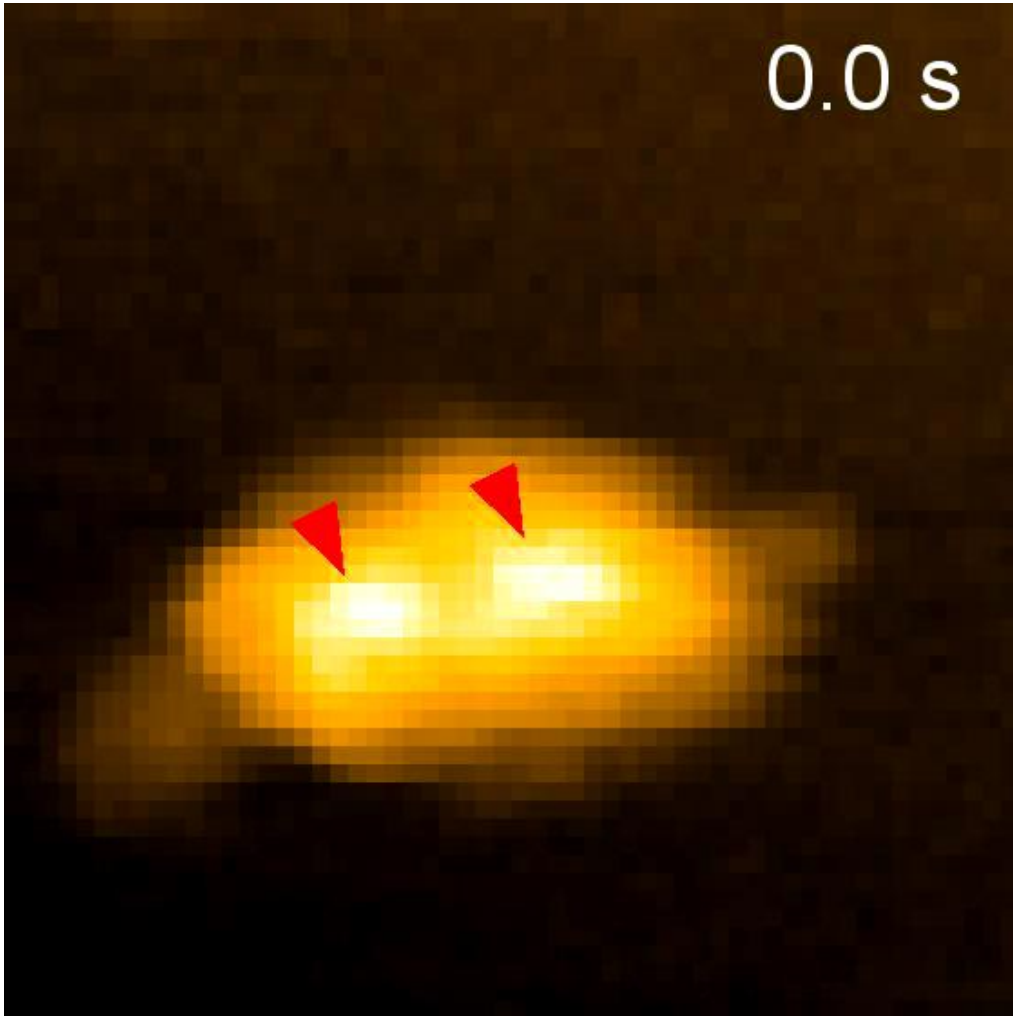

**Movie S3 HS-AFM movie showing the shedding process of the peaks.** The particles were scanned at 10 fps. The scanning field was  $70 \times 70 \text{ nm}^2$  with  $56 \times 56$  pixels. The video was played at 10 fps. The peaks are indicated by the red triangles.

## Movie S4

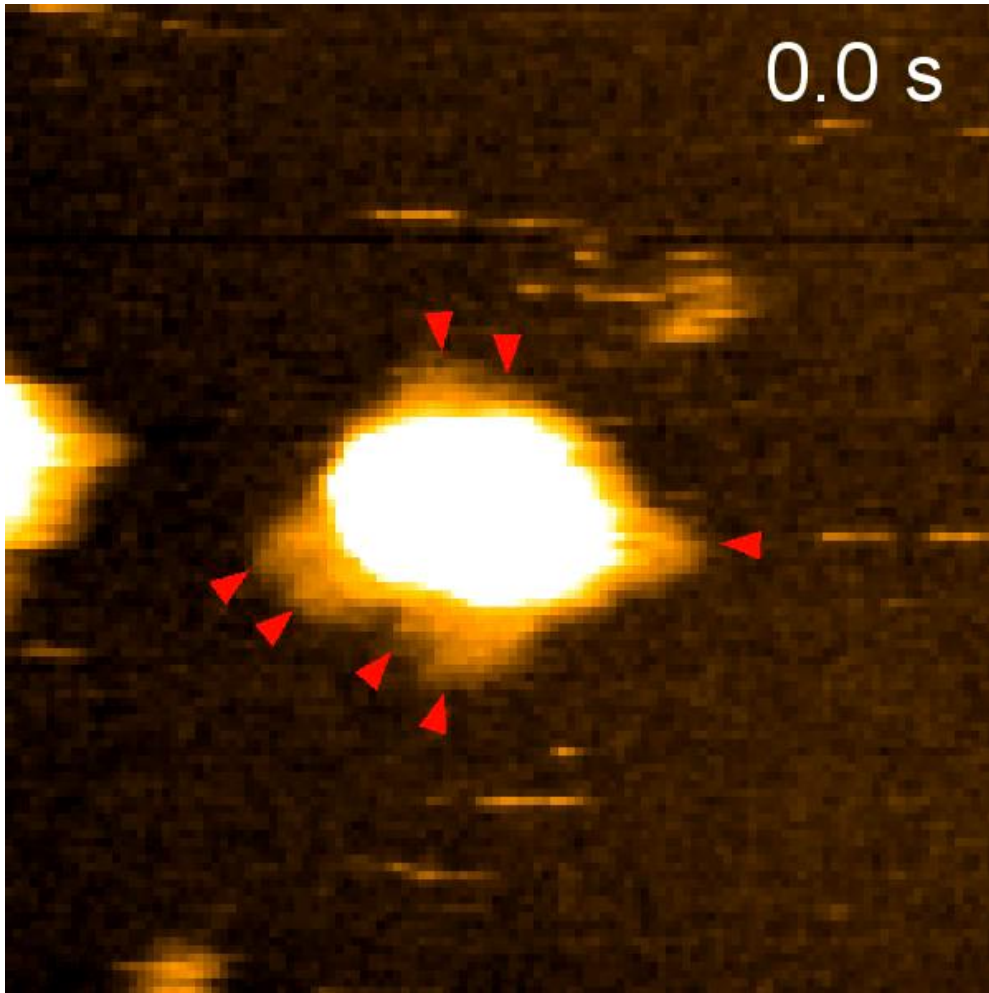

**Movie S4 HS-AFM movie showing fluctuations in protrusions.** The particles were scanned at 2 fps. The scanning field was  $120 \times 120 \text{ nm}^2$  with  $120 \times 120$  pixels. The video was played at 1 fps. The protrusions are indicated by the red triangles.
